# Supplementary material for: DEAD-box RNA helicases Dbp2, Ded1 and Mss116 bind to G-quadruplex nucleic acids and destabilize G-quadruplex RNA
Source: Royal Society of Chemistry journal article supplement (doi:10.1039/c8cc10091h), 2019-01-01
Supplement: c8cc10091h2.xlsx [file c8cc10091h2.xlsx]

## Sheet: Filtered and sorted
#	Identified Proteins (262)	Accession Number	Molecular Weight	Protein Grouping Ambiguity	TOTAL SPECTRA	Cntrl.1	/Cntrl.1/	1	Cntrl_2	/Cntrl_2/	2	Total spectra T15	Total spectra G4	Fold.1	Fold.2	Average	2-fold Enrich	G-stat.1	G-stat.2	p-val.1	p-val.2	avg p-val	VERY STRINGENT SIGNIFICANCE FILTER	RELAXED SIGNIFICANCE FILTER	CONSISTENT SIGNIFICANCE FILTER
10	ATP-dependent RNA helicase DBP2 OS=Saccharomyces cerevisiae (strain YJM789) GN=DBP2 PE=3 SV=1	DBP2_YEAS7 (+1)	61 kDa	TRUE	184	1	2.28739	73	5	10.9898	105	6	178	31.9142	9.55429	20.7342	TRUE	45.2039	50.6906	1.77549e-11	1.08138e-12	9.41813e-12	TRUE	TRUE	FALSE
21	Serine/threonine-protein kinase KSP1 OS=Saccharomyces cerevisiae GN=KSP1 PE=1 SV=1	KSP1_YEAST	117 kDa		101.1	3	6.86216	58	0.1	0.219797	40	3.1	98	8.45215	181.986	95.2193	TRUE	25.5318	29.0088	4.3516e-07	7.20519e-08	2.53606e-07	TRUE	TRUE	TRUE
9	60S ribosomal protein L2 OS=Saccharomyces cerevisiae GN=RPL2A PE=1 SV=3	RPL2A_YEAST	27 kDa		192	8	18.2991	102	7	15.3858	75	15	177	5.57405	4.87464	5.22434	TRUE	36.3471	25.086	1.65125e-09	5.48288e-07	2.7497e-07	TRUE	TRUE	FALSE
39	Meiotic sister-chromatid recombination protein 3 OS=Saccharomyces cerevisiae GN=MSC3 PE=1 SV=1	MSC3_YEAST	81 kDa		53.2	0.1	0.228739	24	0.1	0.219797	29	0.2	53	104.923	131.94	118.432	TRUE	16.4025	20.7392	5.12169e-05	5.26278e-06	2.82399e-05	TRUE	TRUE	TRUE
12	40S ribosomal protein S6 OS=Saccharomyces cerevisiae GN=RPS6A PE=1 SV=1	RPS6A_YEAST	27 kDa		161	8	18.2991	66	10	21.9797	77	18	143	3.60674	3.50324	3.55499	TRUE	16.432	19.2681	5.04266e-05	1.1359e-05	3.08928e-05	FALSE	TRUE	FALSE
23	ATP-dependent RNA helicase DED1 OS=Saccharomyces cerevisiae (strain YJM789) GN=DED1 PE=3 SV=1	DED1_YEAS7 (+1)	66 kDa	TRUE	142	5	11.4369	61	9	19.7817	67	14	128	5.3336	3.38697	4.36028	TRUE	20.9638	16.1307	4.68036e-06	5.91187e-05	3.18995e-05	FALSE	TRUE	FALSE
36	RNA polymerase II transcriptional coactivator SUB1 OS=Saccharomyces cerevisiae GN=SUB1 PE=1 SV=1	SUB1_YEAST	33 kDa		52.1	1	2.28739	25	0.1	0.219797	26	1.1	51	10.9295	118.291	64.6103	TRUE	12.0848	18.4929	0.000508334	1.70541e-05	0.000262694	TRUE	TRUE	TRUE
58	Single-stranded nucleic acid-binding protein OS=Saccharomyces cerevisiae GN=SBP1 PE=1 SV=2	SBP1_YEAST	33 kDa		35.2	0.1	0.228739	17	0.1	0.219797	18	0.2	35	74.3206	81.8939	78.1073	TRUE	11.3675	12.5278	0.000747413	0.000400947	0.00057418	TRUE	TRUE	TRUE
45	Glutamyl-tRNA synthetase, cytoplasmic OS=Saccharomyces cerevisiae GN=GUS1 PE=1 SV=3	GUS1_YEAST	81 kDa		47.1	0.1	0.228739	13	1	2.19797	33	1.1	46	56.8334	15.0139	35.9237	TRUE	8.50856	18.1564	0.0035348	2.03486e-05	0.00177757	TRUE	TRUE	TRUE
71	Uncharacterized protein YIL055C OS=Saccharomyces cerevisiae GN=YIL055C PE=1 SV=1	YIF5_YEAST	71 kDa		26.2	0.1	0.228739	13	0.1	0.219797	13	0.2	26	56.8334	59.1456	57.9895	TRUE	8.50856	8.82586	0.0035348	0.00296991	0.00325235	TRUE	TRUE	TRUE
29	40S ribosomal protein S8 OS=Saccharomyces cerevisiae GN=RPS8A PE=1 SV=3	RPS8A_YEAST	22 kDa		70	5	11.4369	47	1	2.19797	17	6	64	4.10949	7.73442	5.92196	TRUE	13.1897	7.3746	0.000281498	0.00661516	0.00344833	TRUE	TRUE	FALSE
63.1	Cyclin (Bur2p)-dependent protein kinase OS=Saccharomyces cerevisiae GN=SGV1 PE=1 SV=1	SGV1_YEAST	74 kDa	TRUE	27.2	0.1	0.228739	11	0.1	0.219797	16	0.2	27	48.0898	72.7946	60.4422	TRUE	7.08675	11.0439	0.0077656	0.000889805	0.0043277	TRUE	TRUE	TRUE
69	U1 small nuclear ribonucleoprotein component PRP42 OS=Saccharomyces cerevisiae GN=PRP42 PE=1 SV=1	PRP42_YEAST	65 kDa		27.1	9	20.5865	5	0.1	0.219797	13	9.1	18	-4.1173	59.1456	27.5141	TRUE	6.82178	8.82586	0.00900529	0.00296991	0.0059876	FALSE	TRUE	FALSE
14.1	60S ribosomal protein L4-A OS=Saccharomyces cerevisiae GN=RPL4A PE=1 SV=4	RPL4A_YEAST	39 kDa	TRUE	140	17	38.8856	73	4	8.79186	46	21	119	1.8773	5.23211	3.55471	TRUE	6.29459	16.0761	0.0121107	6.08467e-05	0.00608578	FALSE	TRUE	FALSE
15.1	60S ribosomal protein L21-A OS=Saccharomyces cerevisiae GN=RPL21A PE=1 SV=1	RPL21A_YEAST	18 kDa	TRUE	147	14	32.0234	65	11	24.1776	57	25	122	2.02976	2.35755	2.19366	TRUE	6.76431	8.25264	0.00929989	0.00406927	0.00668458	FALSE	TRUE	FALSE
5	Putative RNA-binding protein YGR250C OS=Saccharomyces cerevisiae GN=YGR250C PE=1 SV=1	RIE1_YEAST	90 kDa		305	51	116.657	170	16	35.1675	68	67	238	1.45727	1.93361	1.69544	FALSE	6.20577	6.51814	0.0127335	0.010678	0.0117057	FALSE	FALSE	FALSE
18	Nucleolar protein 3 OS=Saccharomyces cerevisiae GN=NPL3 PE=1 SV=1	NPL3_YEAST	45 kDa		109	9	20.5865	43	8	17.5837	49	17	92	2.08875	2.78667	2.43771	TRUE	4.74306	9.22053	0.0294167	0.00239316	0.0159049	FALSE	TRUE	FALSE
98	ATP-dependent RNA helicase DBP1 OS=Saccharomyces cerevisiae GN=DBP1 PE=1 SV=2	DBP1_YEAST	68 kDa	TRUE	65	4	9.14955	25	4	8.79186	32	8	57	2.73238	3.63973	3.18605	TRUE	4.40915	8.24305	0.0357467	0.00409084	0.0199187	FALSE	TRUE	FALSE
100	Heat shock protein SSB2 OS=Saccharomyces cerevisiae GN=SSB2 PE=1 SV=2	SSB2_YEAST	67 kDa		17.2	0.1	0.228739	9	0.1	0.219797	8	0.2	17	39.3462	36.3973	37.8718	TRUE	5.67234	5.16127	0.0172344	0.023096	0.0201652	FALSE	FALSE	TRUE
86	E3 ubiquitin-protein ligase BRE1 OS=Saccharomyces cerevisiae GN=BRE1 PE=1 SV=1	BRE1_YEAST	81 kDa		21.2	0.1	0.228739	15	0.1	0.219797	6	0.2	21	65.577	27.298	46.4375	TRUE	9.93587	3.71546	0.00162089	0.0539107	0.0277658	FALSE	TRUE	TRUE
82	60S ribosomal protein L34-A OS=Saccharomyces cerevisiae GN=RPL34A PE=1 SV=1	RPL34A_YEAST (+1)	14 kDa		22.1	1	2.28739	14	0.1	0.219797	7	1.1	21	6.12052	31.8476	18.9841	TRUE	5.20008	4.43622	0.0225859	0.035184	0.0288849	FALSE	FALSE	TRUE
64	Aminoacyl-tRNA synthetase Cofactor OS=Saccharomyces cerevisiae GN=ARC1 PE=1 SV=2	ARC1_YEAST	42 kDa		28.2	0.1	0.228739	6	0.1	0.219797	22	0.2	28	26.2308	100.093	63.1617	TRUE	3.57276	15.5052	0.0587346	8.22793e-05	0.0294085	FALSE	TRUE	TRUE
92	Protein AIR2 OS=Saccharomyces cerevisiae GN=AIR2 PE=1 SV=1	AIR2_YEAST	39 kDa		19.2	0.1	0.228739	6	0.1	0.219797	13	0.2	19	26.2308	59.1456	42.6882	TRUE	3.57276	8.82586	0.0587346	0.00296991	0.0308523	FALSE	TRUE	TRUE
25	60S ribosomal protein L3 OS=Saccharomyces cerevisiae GN=RPL3 PE=1 SV=4	RPL3_YEAST	44 kDa		84	11	25.1613	46	3	6.5939	24	14	70	1.82821	3.63973	2.73397	TRUE	3.67019	6.17098	0.0553939	0.0129863	0.0341901	FALSE	FALSE	FALSE
104	ATP-dependent RNA helicase MSS116, mitochondrial OS=Saccharomyces cerevisiae GN=MSS116 PE=1 SV=1	MSS116_YEAST	76 kDa		16.2	0.1	0.228739	6	0.1	0.219797	10	0.2	16	26.2308	45.4966	35.8637	TRUE	3.57276	6.62071	0.0587346	0.01008	0.0344073	FALSE	FALSE	TRUE
111	rRNA 2'-O-methyltransferase fibrillarin OS=Saccharomyces cerevisiae GN=NOP1 PE=1 SV=1	NOP1_YEAST	34 kDa		14.2	0.1	0.228739	7	0.1	0.219797	7	0.2	14	30.6026	31.8476	31.2251	TRUE	4.26869	4.43622	0.0388209	0.035184	0.0370024	FALSE	FALSE	TRUE
112	RNA annealing protein YRA1 OS=Saccharomyces cerevisiae GN=YRA1 PE=1 SV=2	YRA1_YEAST	25 kDa		14.2	0.1	0.228739	6	0.1	0.219797	8	0.2	14	26.2308	36.3973	31.314	TRUE	3.57276	5.16127	0.0587346	0.023096	0.0409153	FALSE	FALSE	TRUE
88	60S ribosomal protein L5 OS=Saccharomyces cerevisiae GN=RPL5 PE=1 SV=3	RPL5_YEAST	34 kDa		21.2	0.1	0.228739	16	0.1	0.219797	5	0.2	21	69.9488	22.7483	46.3486	TRUE	10.6512	3.00046	0.0011	0.0832407	0.0421703	FALSE	TRUE	TRUE
24	60S ribosomal protein L13-B OS=Saccharomyces cerevisiae GN=RPL13B PE=1 SV=1	RPL13B_YEAST	23 kDa		88	4	9.14955	64	3	6.5939	17	7	81	6.99488	2.57814	4.78651	TRUE	25.7991	2.82815	3.78874e-07	0.0926251	0.0463128	FALSE	TRUE	FALSE
118	DNA topoisomerase 2-associated protein PAT1 OS=Saccharomyces cerevisiae GN=PAT1 PE=1 SV=3	PAT1_YEAST	88 kDa		13.2	0.1	0.228739	8	0.1	0.219797	5	0.2	13	34.9744	22.7483	28.8614	TRUE	4.96887	3.00046	0.0258076	0.0832407	0.0545241	FALSE	FALSE	TRUE
120	Ribosome biogenesis protein NSA2 OS=Saccharomyces cerevisiae (strain YJM789) GN=NSA2 PE=3 SV=1	NSA2_YEAS7 (+1)	30 kDa		12.2	0.1	0.228739	6	0.1	0.219797	6	0.2	12	26.2308	27.298	26.7644	TRUE	3.57276	3.71546	0.0587346	0.0539107	0.0563227	FALSE	FALSE	TRUE
93	Protein HRB1 OS=Saccharomyces cerevisiae GN=HRB1 PE=1 SV=2	HRB1_YEAST	52 kDa		18.1	1	2.28739	11	0.1	0.219797	6	1.1	17	4.80898	27.298	16.0535	TRUE	3.48216	3.71546	0.0620339	0.0539107	0.0579723	FALSE	FALSE	TRUE
11	40S ribosomal protein S11 OS=Saccharomyces cerevisiae GN=RPS11A PE=1 SV=3	RS11_YEAST	18 kDa		158	17	38.8856	66	17	37.3654	58	34	124	1.69729	1.55224	1.62476	FALSE	4.2423	2.78877	0.0394287	0.094927	0.0671778	FALSE	FALSE	FALSE
40	40S ribosomal protein S9-B OS=Saccharomyces cerevisiae GN=RPS9B PE=1 SV=4	RS9B_YEAST	22 kDa		51	2	4.57477	35	2	4.39593	12	4	47	7.65065	2.7298	5.19022	TRUE	14.673	2.17279	0.000127862	0.140471	0.0702995	FALSE	TRUE	FALSE
103	SWIRM domain-containing protein FUN19 OS=Saccharomyces cerevisiae GN=FUN19 PE=1 SV=3	FUN19_YEAST	47 kDa		15.2	0.1	0.228739	4	0.1	0.219797	11	0.2	15	17.4872	50.0463	33.7667	TRUE	2.20054	7.35398	0.137963	0.00669144	0.072327	FALSE	TRUE	TRUE
55	Transcriptional regulatory protein LGE1 OS=Saccharomyces cerevisiae GN=LGE1 PE=1 SV=1	LGE1_YEAST	37 kDa		35.1	3	6.86216	15	0.1	0.219797	17	3.1	32	2.1859	77.3442	39.7651	TRUE	1.80696	11.7854	0.178873	0.00059698	0.0897349	FALSE	TRUE	FALSE
108	Elongation factor 2 OS=Saccharomyces cerevisiae GN=EFT1 PE=1 SV=1	EF2_YEAST	93 kDa		15.2	0.1	0.228739	14	1	2.19797	0.1	1.1	14.1	61.2052	-21.9797	19.6128	TRUE	9.22161	1.73031	0.00239175	0.188371	0.0953813	FALSE	TRUE	FALSE
46.1	Heat shock protein SSA1 OS=Saccharomyces cerevisiae GN=SSA1 PE=1 SV=4	HSP71_YEAST	70 kDa	TRUE	37	4	9.14955	24	1	2.19797	8	5	32	2.62308	3.63973	3.1314	TRUE	3.98343	2.0495	0.0459498	0.152256	0.099103	FALSE	FALSE	FALSE
72	54S ribosomal protein L20, mitochondrial OS=Saccharomyces cerevisiae GN=MRPL20 PE=1 SV=2	RM20_YEAST	22 kDa		24.1	2	4.57477	11	0.1	0.219797	11	2.1	22	2.40449	50.0463	26.2254	TRUE	1.58081	7.35398	0.208644	0.00669144	0.107668	FALSE	TRUE	FALSE
20.1	60S ribosomal protein L24-B OS=Saccharomyces cerevisiae GN=RPL24B PE=1 SV=1	RL24B_YEAST	18 kDa	TRUE	88	7	16.0117	31	11	24.1776	39	18	70	1.93608	1.61306	1.77457	FALSE	2.86189	2.15772	0.0907007	0.141855	0.116278	FALSE	FALSE	FALSE
160	54S ribosomal protein L16, mitochondrial OS=Saccharomyces cerevisiae GN=MRPL16 PE=1 SV=1	RM16_YEAST	27 kDa		9.2	0.1	0.228739	3	0.1	0.219797	6	0.2	9	13.1154	27.298	20.2067	TRUE	1.53129	3.71546	0.215919	0.0539107	0.134915	FALSE	FALSE	TRUE
145	COMPASS component BRE2 OS=Saccharomyces cerevisiae GN=BRE2 PE=1 SV=2	BRE2_YEAST	58 kDa		8.2	0.1	0.228739	5	0.1	0.219797	3	0.2	8	21.859	13.649	17.754	TRUE	2.88256	1.59972	0.0895438	0.205943	0.147744	FALSE	FALSE	TRUE
137	COMPASS component SPP1 OS=Saccharomyces cerevisiae GN=SPP1 PE=1 SV=1	SPP1_YEAST	41 kDa		8.2	0.1	0.228739	3	0.1	0.219797	5	0.2	8	13.1154	22.7483	17.9319	TRUE	1.53129	3.00046	0.215919	0.0832407	0.14958	FALSE	FALSE	TRUE
65	40S ribosomal protein S2 OS=Saccharomyces cerevisiae GN=RPS2 PE=1 SV=3	RS2_YEAST	27 kDa		28	2	4.57477	14	2	4.39593	10	4	24	3.06026	2.27483	2.66755	TRUE	2.86706	1.33972	0.0904101	0.247083	0.168747	FALSE	FALSE	FALSE
106	U1 small nuclear ribonucleoprotein component SNU71 OS=Saccharomyces cerevisiae (strain YJM789) GN=SNU71 PE=3 SV=1	SNU71_YEAS7 (+1)	71 kDa		16.2	0.1	0.228739	2	0.1	0.219797	14	0.2	16	8.7436	63.6953	36.2194	TRUE	0.884974	9.56401	0.346843	0.00198429	0.174414	FALSE	TRUE	TRUE
76.1	40S ribosomal protein S26-A OS=Saccharomyces cerevisiae GN=RPS26A PE=1 SV=1	RS26A_YEAST	14 kDa	TRUE	22	1	2.28739	10	2	4.39593	9	3	19	4.3718	2.04735	3.20957	TRUE	2.93734	0.971029	0.0865531	0.324424	0.205488	FALSE	FALSE	FALSE
90	60S ribosomal protein L15-A OS=Saccharomyces cerevisiae GN=RPL15A PE=1 SV=3	RL15A_YEAST	24 kDa		20.1	3	6.86216	14	0.1	0.219797	3	3.1	17	2.04017	13.649	7.84458	TRUE	1.45641	1.59972	0.227502	0.205943	0.216722	FALSE	FALSE	FALSE
37.1	40S ribosomal protein S1-B OS=Saccharomyces cerevisiae (strain RM11-1a) GN=RPS1B PE=3 SV=1	RS3A2_YEAS1 (+3)	29 kDa	TRUE	44.1	0.1	0.228739	23	5	10.9898	16	5.1	39	100.551	1.45589	51.0037	TRUE	15.6813	0.574655	7.49601e-05	0.448415	0.224245	FALSE	TRUE	FALSE
109	Protein PSP2 OS=Saccharomyces cerevisiae GN=PSP2 PE=1 SV=2	PSP2_YEAST	66 kDa		15.1	0.1	0.228739	3	2	4.39593	10	2.1	13	13.1154	2.27483	7.69512	TRUE	1.53129	1.33972	0.215919	0.247083	0.231501	FALSE	FALSE	FALSE
43	60S ribosomal protein L16-A OS=Saccharomyces cerevisiae GN=RPL16A PE=1 SV=3	RL16A_YEAST	22 kDa	TRUE	105	22	50.3225	61	3	6.5939	19	25	80	1.21218	2.88145	2.04682	TRUE	0.627032	3.716	0.428446	0.0538934	0.24117	FALSE	FALSE	FALSE
3.1	60S ribosomal protein L17-A OS=Saccharomyces cerevisiae GN=RPL17A PE=1 SV=4	RL17A_YEAST	21 kDa	TRUE	334	23	52.6099	99	62	136.274	150	85	249	1.88178	1.10072	1.49125	FALSE	8.64392	0.431232	0.00328155	0.511385	0.257333	FALSE	FALSE	FALSE
156	Fructose-bisphosphate aldolase OS=Saccharomyces cerevisiae GN=FBA1 PE=1 SV=3	ALF_YEAST	40 kDa		8.1	0.1	0.228739	4	2	4.39593	2	2.1	6	17.4872	-2.19797	7.64462	TRUE	2.20054	0.605448	0.137963	0.436507	0.287235	FALSE	FALSE	FALSE
95	Histone-lysine N-methyltransferase, H3 lysine-4 specific OS=Saccharomyces cerevisiae GN=SET1 PE=1 SV=1	SET1_YEAST	124 kDa		18.2	0.1	0.228739	17	0.1	0.219797	1	0.2	18	74.3206	4.54966	39.4351	TRUE	11.3675	0.312336	0.000747413	0.57625	0.288499	FALSE	TRUE	TRUE
116	60S ribosomal protein L43 OS=Saccharomyces cerevisiae GN=RPL43A PE=1 SV=2	RL43_YEAST	10 kDa		13.1	0.1	0.228739	8	1	2.19797	4	1.1	12	34.9744	1.81986	18.3971	TRUE	4.96887	0.321226	0.0258076	0.570872	0.29834	FALSE	FALSE	FALSE
110	60S ribosomal protein L42 OS=Saccharomyces cerevisiae GN=RPL42A PE=1 SV=3	RL44_YEAST	12 kDa		15.1	0.1	0.228739	6	2	4.39593	7	2.1	13	26.2308	1.59238	13.9116	TRUE	3.57276	0.365855	0.0587346	0.545272	0.302003	FALSE	FALSE	FALSE
138	Lipase 4 OS=Saccharomyces cerevisiae GN=TGL4 PE=1 SV=1	TGL4_YEAST	103 kDa		9.2	0.1	0.228739	1	0.1	0.219797	8	0.2	9	4.3718	36.3973	20.3845	TRUE	0.29324	5.16127	0.588152	0.023096	0.305624	FALSE	FALSE	TRUE
143	60S ribosomal protein L39 OS=Saccharomyces cerevisiae GN=RPL39 PE=1 SV=3	RL39_YEAST	6 kDa		9.1	1	2.28739	5	0.1	0.219797	3	1.1	8	2.1859	13.649	7.91744	TRUE	0.60096	1.59972	0.438212	0.205943	0.322078	FALSE	FALSE	FALSE
70	60S ribosomal protein L19 OS=Saccharomyces cerevisiae GN=RPL19A PE=1 SV=5	RL19_YEAST	22 kDa		26	3	6.86216	10	2	4.39593	11	5	21	1.45727	2.50231	1.97979	FALSE	0.349818	1.74211	0.554216	0.186872	0.370544	FALSE	FALSE	FALSE
97.1	60S ribosomal protein L36-B OS=Saccharomyces cerevisiae GN=RPL36B PE=1 SV=3	RL36B_YEAST	11 kDa	TRUE	17	1	2.28739	11	2	4.39593	3	3	14	4.80898	-1.46531	1.67184	FALSE	3.48216	0.170054	0.0620339	0.680064	0.371049	FALSE	FALSE	FALSE
99	Histone H4 OS=Saccharomyces cerevisiae GN=HHF1 PE=1 SV=2	H4_YEAST	11 kDa		17.1	0.1	0.228739	6	4	8.79186	7	4.1	13	26.2308	-1.25598	12.4874	TRUE	3.57276	0.129633	0.0587346	0.718813	0.388774	FALSE	FALSE	FALSE
151	Uncharacterized protein YPL034W OS=Saccharomyces cerevisiae GN=YPL034W PE=2 SV=1	YP034_YEAST	19 kDa		8.1	0.1	0.228739	3	1	2.19797	4	1.1	7	13.1154	1.81986	7.46763	TRUE	1.53129	0.321226	0.215919	0.570872	0.393396	FALSE	FALSE	FALSE
28	40S ribosomal protein S18 OS=Saccharomyces cerevisiae GN=RPS18A PE=1 SV=4	RS18_YEAST	17 kDa		77	13	29.736	36	6	13.1878	22	19	58	1.21065	1.66821	1.43943	FALSE	0.362897	1.36158	0.546901	0.243265	0.395083	FALSE	FALSE	FALSE
89	56 kDa U1 small nuclear ribonucleoprotein component OS=Saccharomyces cerevisiae GN=SNU56 PE=1 SV=1	SNU56_YEAST	57 kDa		21.1	4	9.14955	11	0.1	0.219797	6	4.1	17	1.20225	27.298	14.2501	TRUE	0.10263	3.71546	0.748697	0.0539107	0.401304	FALSE	FALSE	FALSE
131	54S ribosomal protein L31, mitochondrial OS=Saccharomyces cerevisiae GN=MRPL31 PE=1 SV=1	RM31_YEAST	16 kDa		10.1	0.1	0.228739	6	1	2.19797	3	1.1	9	26.2308	1.3649	13.7979	TRUE	3.57276	0.0763155	0.0587346	0.782354	0.420544	FALSE	FALSE	FALSE
127	Lipase 3 OS=Saccharomyces cerevisiae GN=TGL3 PE=1 SV=2	TGL3_YEAST	74 kDa		12.3	0.1	0.228739	0.1	0.1	0.219797	12	0.2	12.1	-2.28739	54.5959	26.1543	TRUE	0.0332978	8.08912	0.855208	0.00445318	0.429831	FALSE	TRUE	FALSE
125	Pre-mRNA-processing protein PRP40 OS=Saccharomyces cerevisiae GN=PRP40 PE=1 SV=1	PRP40_YEAST	69 kDa		11.3	0.1	0.228739	0.1	0.1	0.219797	11	0.2	11.1	-2.28739	50.0463	23.8794	TRUE	0.0332978	7.35398	0.855208	0.00669144	0.43095	FALSE	TRUE	FALSE
135	Heat shock protein SSC1, mitochondrial OS=Saccharomyces cerevisiae GN=SSC1 PE=1 SV=1	HSP77_YEAST	71 kDa		8.3	0.1	0.228739	8	0.1	0.219797	0.1	0.2	8.1	34.9744	-2.19797	16.3882	TRUE	4.96887	0.0302422	0.0258076	0.861942	0.443875	FALSE	FALSE	FALSE
144	Regulatory protein ADR1 OS=Saccharomyces cerevisiae GN=ADR1 PE=1 SV=2	ADR1_YEAST	151 kDa		8.3	0.1	0.228739	8	0.1	0.219797	0.1	0.2	8.1	34.9744	-2.19797	16.3882	TRUE	4.96887	0.0302422	0.0258076	0.861942	0.443875	FALSE	FALSE	FALSE
117	60S ribosomal protein L7-A OS=Saccharomyces cerevisiae GN=RPL7A PE=1 SV=3	RL7A_YEAST (+1)	28 kDa		13.1	3	6.86216	6	0.1	0.219797	4	3.1	10	-1.14369	18.1986	8.52748	TRUE	0.0355665	2.29369	0.850414	0.129901	0.490157	FALSE	FALSE	FALSE
148	40S ribosomal protein S15 OS=Saccharomyces cerevisiae GN=RPS15 PE=1 SV=1	RS15_YEAST	16 kDa		8.1	0.1	0.228739	5	1	2.19797	2	1.1	7	21.859	-1.09898	10.38	TRUE	2.88256	0.00587967	0.0895438	0.938879	0.514211	FALSE	FALSE	FALSE
35	60S ribosomal protein L28 OS=Saccharomyces cerevisiae GN=RPL28 PE=1 SV=2	RL28_YEAST	17 kDa		54	7	16.0117	31	5	10.9898	11	12	42	1.93608	1.00093	1.4685	FALSE	2.86189	2.95285e-06	0.0907007	0.998629	0.544665	FALSE	FALSE	FALSE
81	Pre-mRNA-processing factor 39 OS=Saccharomyces cerevisiae GN=PRP39 PE=1 SV=1	PRP39_YEAST	75 kDa		22	4	9.14955	10	1	2.19797	7	5	17	1.09295	3.18476	2.13886	TRUE	0.0229208	1.54902	0.879663	0.213281	0.546472	FALSE	FALSE	FALSE
83	40S ribosomal protein S13 OS=Saccharomyces cerevisiae GN=RPS13 PE=1 SV=3	RS13_YEAST	17 kDa		22	4	9.14955	10	1	2.19797	7	5	17	1.09295	3.18476	2.13886	TRUE	0.0229208	1.54902	0.879663	0.213281	0.546472	FALSE	FALSE	FALSE
31.1	60S ribosomal protein L37-A OS=Saccharomyces cerevisiae GN=RPL37A PE=1 SV=2	RL37A_YEAST	10 kDa	TRUE	58	9	20.5865	24	6	13.1878	19	15	43	1.16581	1.44073	1.30327	FALSE	0.158662	0.649275	0.690391	0.420372	0.555382	FALSE	FALSE	FALSE
129	U1 small nuclear ribonucleoprotein C homolog OS=Saccharomyces cerevisiae GN=YHC1 PE=1 SV=1	RU1C_YEAST	27 kDa		10.1	2	4.57477	5	0.1	0.219797	3	2.1	8	1.09295	13.649	7.37097	TRUE	0.0114436	1.59972	0.914809	0.205943	0.560376	FALSE	FALSE	FALSE
56	40S ribosomal protein S17-A OS=Saccharomyces cerevisiae GN=RPS17A PE=1 SV=1	RS17A_YEAST (+1)	16 kDa		33	4	9.14955	14	4	8.79186	11	8	25	1.53013	1.25116	1.39064	FALSE	0.608618	0.152822	0.435309	0.695853	0.565581	FALSE	FALSE	FALSE
132	Succinate dehydrogenase [ubiquinone] flavoprotein subunit, mitochondrial OS=Saccharomyces cerevisiae GN=SDH1 PE=1 SV=1	DHSA_YEAST	70 kDa		10	1	2.28739	4	1	2.19797	4	2	8	1.74872	1.81986	1.78429	FALSE	0.277896	0.321226	0.598084	0.570872	0.584478	FALSE	FALSE	FALSE
62	40S ribosomal protein S16 OS=Saccharomyces cerevisiae GN=RPS16A PE=1 SV=2	RS16_YEAST	16 kDa		29	5	11.4369	16	2	4.39593	6	7	22	1.39898	1.3649	1.38194	FALSE	0.455986	0.152773	0.499506	0.695899	0.597702	FALSE	FALSE	FALSE
66.1	60S ribosomal protein L11-A OS=Saccharomyces cerevisiae GN=RPL11A PE=1 SV=2	RL11A_YEAST	20 kDa	TRUE	26	3	6.86216	7	3	6.5939	13	6	20	1.02009	1.97152	1.4958	FALSE	0.000834562	1.2867	0.976953	0.256656	0.616805	FALSE	FALSE	FALSE
139	60S ribosomal protein L18 OS=Saccharomyces cerevisiae GN=RPL18A PE=1 SV=1	RL18_YEAST	21 kDa		9.1	2	4.57477	5	0.1	0.219797	2	2.1	7	1.09295	9.09932	5.09614	TRUE	0.0114436	0.928718	0.914809	0.335196	0.625002	FALSE	FALSE	FALSE
105	40S ribosomal protein S23 OS=Saccharomyces cerevisiae GN=RPS23A PE=1 SV=1	RS23_YEAST	16 kDa		16	2	4.57477	6	2	4.39593	6	4	12	1.31154	1.3649	1.33822	FALSE	0.115392	0.152773	0.734087	0.695899	0.714993	FALSE	FALSE	FALSE
53	40S ribosomal protein S4 OS=Saccharomyces cerevisiae GN=RPS4A PE=1 SV=3	RS4_YEAST	29 kDa		37	8	18.2991	19	3	6.5939	7	11	26	1.0383	1.06159	1.04995	FALSE	0.00803953	0.00757845	0.928555	0.930628	0.929592	FALSE	FALSE	FALSE
1	Single-stranded DNA-binding protein RIM1, mitochondrial OS=Saccharomyces cerevisiae GN=RIM1 PE=1 SV=1	RIM1_YEAST	15 kDa		1079	213	487.213	255	285	626.42	326	498	581	-1.91064	-1.92153	-1.91609	FALSE	52.5052	74.7472	4.29114e-13	5.35025e-18	2.1456e-13	FALSE	FALSE	FALSE
7	Uncharacterized RNA-binding protein YPL184C OS=Saccharomyces cerevisiae GN=YPL184C PE=1 SV=1	YP184_YEAST	69 kDa		260	102	233.313	67	56	123.086	35	158	102	-3.48229	-3.51675	-3.49952	FALSE	67.0564	36.0677	2.63845e-16	1.90584e-09	9.5292e-10	FALSE	FALSE	FALSE
4	Nuclear and cytoplasmic polyadenylated RNA-binding protein PUB1 OS=Saccharomyces cerevisiae GN=PUB1 PE=1 SV=3	PUB1_YEAST	51 kDa		331	102	233.313	74	81	178.035	74	183	148	-3.15288	-2.40588	-2.77938	FALSE	59.386	30.5136	1.29587e-14	3.31527e-08	1.65764e-08	FALSE	FALSE	FALSE
6	Nuclear polyadenylated RNA-binding protein 4 OS=Saccharomyces cerevisiae GN=HRP1 PE=1 SV=1	HRP1_YEAST	60 kDa		257	88	201.29	55	61	134.076	53	149	108	-3.65982	-2.52973	-3.09478	FALSE	60.8408	24.8487	6.18818e-15	6.20094e-07	3.10047e-07	FALSE	FALSE	FALSE
16	Protein NAM8 OS=Saccharomyces cerevisiae GN=NAM8 PE=1 SV=2	NAM8_YEAST	57 kDa		131	42	96.0702	29	31	68.1369	29	73	58	-3.31277	-2.34955	-2.83116	FALSE	25.3921	10.8859	4.67833e-07	0.000968984	0.000484726	FALSE	FALSE	FALSE
44	Negative growth regulatory protein NGR1 OS=Saccharomyces cerevisiae GN=NGR1 PE=1 SV=2	NGR1_YEAST	75 kDa		47	18	41.173	7	13	28.5736	9	31	16	-5.88185	-3.17484	-4.52835	FALSE	18.3815	7.25051	1.80802e-05	0.00708807	0.00355308	FALSE	FALSE	FALSE
87	RNA-binding protein NAB6 OS=Saccharomyces cerevisiae GN=NAB6 PE=1 SV=1	NAB6_YEAST	126 kDa		33.1	15	34.3108	13	5	10.9898	0.1	20	13.1	-2.63929	-109.898	-56.2688	FALSE	6.5014	10.7289	0.010779	0.00105477	0.00591687	FALSE	FALSE	FALSE
13	Ribonuclease H OS=Saccharomyces cerevisiae GN=RNH1 PE=1 SV=2	RNH1_YEAST	39 kDa		159	53	121.231	40	30	65.939	36	83	76	-3.03079	-1.83164	-2.43121	FALSE	28.6843	5.90117	8.51912e-08	0.0151308	0.00756545	FALSE	FALSE	FALSE
42	DNA mismatch repair protein MSH3 OS=Saccharomyces cerevisiae (strain YJM789) GN=MSH3 PE=3 SV=2	MSH3_YEAS7 (+1)	117 kDa		48	13	29.736	11	14	30.7715	10	27	21	-2.70328	-3.07715	-2.89021	FALSE	5.84976	7.49677	0.0155792	0.00618097	0.0108801	FALSE	FALSE	FALSE
48.1	Pyruvate kinase 1 OS=Saccharomyces cerevisiae GN=PYK1 PE=1 SV=2	KPYK1_YEAST	55 kDa	TRUE	37	2	4.57477	19	10	21.9797	6	12	25	4.15321	-3.66328	0.244967	FALSE	5.35289	6.6084	0.0206879	0.0101499	0.0154189	FALSE	FALSE	FALSE
67	ATP synthase subunit beta, mitochondrial OS=Saccharomyces cerevisiae GN=ATP2 PE=1 SV=2	ATPB_YEAST	55 kDa		27	7	16.0117	5	12	26.3756	3	19	8	-3.20234	-8.79186	-5.9971	FALSE	3.99869	15.1988	0.0455355	9.67641e-05	0.0228161	FALSE	FALSE	FALSE
94	ADP,ATP carrier protein 2 OS=Saccharomyces cerevisiae GN=AAC2 PE=1 SV=2	ADT2_YEAST	34 kDa		20	6	13.7243	3	7	15.3858	4	13	7	-4.57477	-3.84644	-4.21061	FALSE	5.01058	4.86883	0.0251929	0.027346	0.0262694	FALSE	FALSE	FALSE
54	Acetyl-coenzyme A synthetase 1 OS=Saccharomyces cerevisiae GN=ACS1 PE=1 SV=2	ACS1_YEAST	79 kDa	TRUE	38.1	4	9.14955	32	2	4.39593	0.1	6	32.1	3.49744	-43.9593	-20.2309	FALSE	7.66496	3.92303	0.00563034	0.0476289	0.0266296	FALSE	TRUE	FALSE
8	RNA-binding suppressor of PAS kinase protein 1 OS=Saccharomyces cerevisiae GN=RBS1 PE=1 SV=1	RBS1_YEAST	52 kDa		226	44	100.645	65	27	59.3451	90	71	155	-1.54838	1.51655	-0.0159156	FALSE	4.96212	3.97158	0.0259085	0.0462742	0.0360913	FALSE	FALSE	FALSE
147	26S proteasome regulatory subunit RPN2 OS=Saccharomyces cerevisiae GN=RPN2 PE=1 SV=4	RPN2_YEAST	104 kDa		8.2	0.1	0.228739	6	2	4.39593	0.1	2.1	6.1	26.2308	-43.9593	-8.86426	FALSE	3.57276	3.92303	0.0587346	0.0476289	0.0531818	FALSE	FALSE	FALSE
59	Actin OS=Saccharomyces cerevisiae GN=ACT1 PE=1 SV=1	ACT_YEAST	42 kDa		31	3	6.86216	17	10	21.9797	1	13	18	2.47735	-21.9797	-9.75115	FALSE	2.57292	17.3471	0.108707	3.1138e-05	0.0543691	FALSE	TRUE	FALSE
122	Morphogenesis-related protein MSB1 OS=Saccharomyces cerevisiae GN=MSB1 PE=1 SV=1	MSB1_YEAST	130 kDa		12.1	5	11.4369	4	3	6.5939	0.1	8	4.1	-2.85923	-65.939	-34.3991	FALSE	2.44219	6.17121	0.118111	0.0129846	0.0655479	FALSE	FALSE	FALSE
171	Histone H2A.1 OS=Saccharomyces cerevisiae GN=HTA1 PE=1 SV=2	H2A1_YEAST (+1)	14 kDa	TRUE	13.1	2	4.57477	0.1	6	13.1878	5	8	5.1	-45.7477	-2.63756	-24.1926	FALSE	4.03069	2.54923	0.0446797	0.110348	0.0775139	FALSE	FALSE	FALSE
85	Potassium-activated aldehyde dehydrogenase, mitochondrial OS=Saccharomyces cerevisiae GN=ALD4 PE=1 SV=2	ALDH4_YEAST	57 kDa	TRUE	22	2	4.57477	12	5	10.9898	3	7	15	2.62308	-3.66328	-0.520098	FALSE	1.9866	3.2971	0.158697	0.0694023	0.11405	FALSE	FALSE	FALSE
50.1	Alcohol dehydrogenase 1 OS=Saccharomyces cerevisiae GN=ADH1 PE=1 SV=4	ADH1_YEAST	37 kDa	TRUE	35	7	16.0117	9	11	24.1776	8	18	17	-1.77908	-3.0222	-2.40064	FALSE	1.26408	5.74019	0.260879	0.016581	0.13873	FALSE	FALSE	FALSE
30	Uncharacterized ATP-dependent helicase YHR031C OS=Saccharomyces cerevisiae GN=YHR031C PE=1 SV=1	YHJ1_YEAST	82 kDa		69	10	22.8739	15	23	50.5532	21	33	36	-1.52492	-2.4073	-1.96611	FALSE	1.03751	8.41658	0.308402	0.00371814	0.15606	FALSE	FALSE	FALSE
152	Protein SUE1, mitochondrial OS=Saccharomyces cerevisiae GN=SUE1 PE=1 SV=1	SUE1_YEAST	24 kDa		8	2	4.57477	1	3	6.5939	2	5	3	-4.57477	-3.29695	-3.93586	FALSE	1.66783	1.74724	0.196549	0.186224	0.191387	FALSE	FALSE	FALSE
47	Polyadenylate-binding protein, cytoplasmic and nuclear OS=Saccharomyces cerevisiae GN=PAB1 PE=1 SV=4	PABP_YEAST	64 kDa		42	13	29.736	12	7	15.3858	10	20	22	-2.478	-1.53858	-2.00829	FALSE	5.05861	0.74327	0.0245039	0.388616	0.20656	FALSE	FALSE	FALSE
155	Histone H2A.Z OS=Saccharomyces cerevisiae GN=HTZ1 PE=1 SV=3	H2AZ_YEAST	14 kDa	TRUE	15	4	9.14955	3	4	8.79186	4	8	7	-3.04985	-2.19797	-2.62391	FALSE	2.13962	1.21217	0.143538	0.270903	0.207221	FALSE	FALSE	FALSE
101	Phosphoglycerate kinase OS=Saccharomyces cerevisiae GN=PGK1 PE=1 SV=2	PGK_YEAST	45 kDa		17	2	4.57477	2	9	19.7817	4	11	6	-2.28739	-4.94542	-3.61641	FALSE	0.666537	7.90446	0.414261	0.00493131	0.209596	FALSE	FALSE	FALSE
130	Mitochondrial outer membrane protein porin 1 OS=Saccharomyces cerevisiae GN=POR1 PE=1 SV=4	VDAC1_YEAST	30 kDa		10	2	4.57477	2	5	10.9898	1	7	3	-2.28739	-10.9898	-6.63861	FALSE	0.666537	6.97942	0.414261	0.00824522	0.211253	FALSE	FALSE	FALSE
61	Histone H2B.1 OS=Saccharomyces cerevisiae GN=HTB1 PE=1 SV=2	H2B1_YEAST (+1)	14 kDa		30	8	18.2991	8	6	13.1878	8	14	16	-2.28739	-1.64847	-1.96793	FALSE	2.67351	0.831458	0.102031	0.361851	0.231941	FALSE	FALSE	FALSE
17	60S ribosomal protein L20 OS=Saccharomyces cerevisiae GN=RPL20A PE=1 SV=2	RL20_YEAST	20 kDa	TRUE	127	38	86.9207	60	7	15.3858	22	45	82	-1.44868	1.42989	-0.00939237	FALSE	3.16153	0.724761	0.0753927	0.394587	0.23499	FALSE	FALSE	FALSE
119	60S ribosomal protein L9-A OS=Saccharomyces cerevisiae GN=RPL9A PE=1 SV=2	RL9A_YEAST (+1)	22 kDa		13	3	6.86216	3	4	8.79186	3	7	6	-2.28739	-2.93062	-2.609	FALSE	1.00026	1.99301	0.317246	0.158026	0.237636	FALSE	FALSE	FALSE
149	40S ribosomal protein S20 OS=Saccharomyces cerevisiae GN=RPS20 PE=1 SV=3	RS20_YEAST	14 kDa		8.1	1	2.28739	5	2	4.39593	0.1	3	5.1	2.1859	-43.9593	-20.8867	FALSE	0.60096	3.92303	0.438212	0.0476289	0.242921	FALSE	FALSE	FALSE
153	40S ribosomal protein S7-B OS=Saccharomyces cerevisiae GN=RPS7B PE=1 SV=1	RS7B_YEAST	22 kDa		8	2	4.57477	2	3	6.5939	1	5	3	-2.28739	-6.5939	-4.44064	FALSE	0.666537	3.22983	0.414261	0.072308	0.243285	FALSE	FALSE	FALSE
19	60S ribosomal protein L16-B OS=Saccharomyces cerevisiae GN=RPL16B PE=1 SV=3	RL16B_YEAST	22 kDa	TRUE	163	43	98.3576	86	6	13.1878	28	49	114	-1.14369	2.12318	0.489741	FALSE	0.52327	3.28567	0.46945	0.0698869	0.269668	FALSE	FALSE	FALSE
121	Ubiquitin OS=Saccharomyces cerevisiae GN=UBI1 PE=1 SV=1	UBIQ_YEAST	9 kDa		10.1	4	9.14955	5	1	2.19797	0.1	5	5.1	-1.82991	-21.9797	-11.9048	FALSE	0.783854	1.73031	0.375965	0.188371	0.282168	FALSE	FALSE	FALSE
142	60S ribosomal protein L38 OS=Saccharomyces cerevisiae GN=RPL38 PE=1 SV=1	RL38_YEAST	9 kDa		9	2	4.57477	2	3	6.5939	2	5	4	-2.28739	-3.29695	-2.79217	FALSE	0.666537	1.74724	0.414261	0.186224	0.300243	FALSE	FALSE	FALSE
51	P24276-DECOY	P24276-DECOY	?		38	9	20.5865	15	7	15.3858	7	16	22	-1.37243	-2.19797	-1.7852	FALSE	0.550016	2.12464	0.458311	0.144947	0.301629	FALSE	FALSE	FALSE
68	Enolase 1 OS=Saccharomyces cerevisiae GN=ENO1 PE=1 SV=2	ENO1_YEAST	47 kDa		27	4	9.14955	7	10	21.9797	6	14	13	-1.30708	-3.66328	-2.48518	FALSE	0.178132	6.6084	0.672983	0.0101499	0.341567	FALSE	FALSE	FALSE
73	40S ribosomal protein S3 OS=Saccharomyces cerevisiae GN=RPS3 PE=1 SV=5	RS3_YEAST	27 kDa		25	7	16.0117	13	4	8.79186	1	11	14	-1.23167	-8.79186	-5.01177	FALSE	0.194031	5.05278	0.659582	0.0245865	0.342084	FALSE	FALSE	FALSE
141	40S ribosomal protein S29-B OS=Saccharomyces cerevisiae GN=RPS29B PE=1 SV=3	RS29B_YEAST	7 kDa	TRUE	12	4	9.14955	4	2	4.39593	2	6	6	-2.28739	-2.19797	-2.24268	FALSE	1.3343	0.605448	0.248042	0.436507	0.342274	FALSE	FALSE	FALSE
52	40S ribosomal protein S14-A OS=Saccharomyces cerevisiae GN=RPS14A PE=1 SV=5	RS14A_YEAST	15 kDa		38	4	9.14955	12	11	24.1776	11	15	23	1.31154	-2.19797	-0.443213	FALSE	0.231161	3.34576	0.630665	0.0673782	0.349021	FALSE	FALSE	FALSE
126	[PIN+] prion protein RNQ1 OS=Saccharomyces cerevisiae GN=RNQ1 PE=1 SV=2	RNQ1_YEAST	43 kDa		11	5	11.4369	4	1	2.19797	1	6	5	-2.85923	-2.19797	-2.5286	FALSE	2.44219	0.302565	0.118111	0.582279	0.350195	FALSE	FALSE	FALSE
32	Elongation factor 1-alpha OS=Saccharomyces cerevisiae GN=TEF1 PE=1 SV=1	EF1A_YEAST	50 kDa		61	7	16.0117	19	18	39.5634	17	25	36	1.18663	-2.32726	-0.570313	FALSE	0.154483	6.16499	0.694287	0.0130303	0.353659	FALSE	FALSE	FALSE
38	Glyceraldehyde-3-phosphate dehydrogenase 3 OS=Saccharomyces cerevisiae GN=TDH3 PE=1 SV=3	G3P3_YEAST	36 kDa		53	8	18.2991	16	18	39.5634	11	26	27	-1.14369	-3.59667	-2.37018	FALSE	0.0951505	11.6949	0.757729	0.000626702	0.379178	FALSE	FALSE	FALSE
78	Protein LSM12 OS=Saccharomyces cerevisiae GN=LSM12 PE=1 SV=1	LSM12_YEAST	21 kDa		23	3	6.86216	3	4	8.79186	13	7	16	-2.28739	1.47864	-0.404373	FALSE	1.00026	0.501415	0.317246	0.478879	0.398063	FALSE	FALSE	FALSE
34	Ubiquitin-like-specific protease 1 OS=Saccharomyces cerevisiae GN=ULP1 PE=1 SV=1	ULP1_YEAST	72 kDa		61	13	29.736	24	10	21.9797	14	23	38	-1.239	-1.56998	-1.40449	FALSE	0.381594	1.15561	0.536751	0.282377	0.409564	FALSE	FALSE	FALSE
22	RNA-binding protein SGN1 OS=Saccharomyces cerevisiae GN=SGN1 PE=1 SV=1	SGN1_YEAST	29 kDa		96	18	41.173	26	15	32.9695	37	33	63	-1.58358	1.12225	-0.230663	FALSE	2.18999	0.146063	0.13891	0.702326	0.420618	FALSE	FALSE	FALSE
157	Protein BOP3 OS=Saccharomyces cerevisiae GN=BOP3 PE=1 SV=1	BOP3_YEAST	44 kDa		8	2	4.57477	2	2	4.39593	2	4	4	-2.28739	-2.19797	-2.24268	FALSE	0.666537	0.605448	0.414261	0.436507	0.425384	FALSE	FALSE	FALSE
107	40S ribosomal protein S25-A OS=Saccharomyces cerevisiae GN=RPS25A PE=1 SV=1	RS25A_YEAST (+1)	12 kDa		16	4	9.14955	6	3	6.5939	3	7	9	-1.52492	-2.19797	-1.86145	FALSE	0.413621	0.908648	0.520137	0.340473	0.430305	FALSE	FALSE	FALSE
96	26S protease regulatory subunit 4 homolog OS=Saccharomyces cerevisiae GN=RPT2 PE=1 SV=3	PRS4_YEAST	49 kDa		18	2	4.57477	4	8	17.5837	4	10	8	-1.14369	-4.39593	-2.76981	FALSE	0.0236957	6.34421	0.877662	0.0117765	0.444719	FALSE	FALSE	FALSE
77	ATP synthase subunit alpha, mitochondrial OS=Saccharomyces cerevisiae GN=ATP1 PE=1 SV=3	ATPA_YEAST	59 kDa		23	5	11.4369	11	5	10.9898	2	10	13	-1.03972	-5.49491	-3.26732	FALSE	0.00520779	4.75825	0.942471	0.0291582	0.485814	FALSE	FALSE	FALSE
128	U1 small nuclear ribonucleoprotein 70 kDa homolog OS=Saccharomyces cerevisiae GN=SNP1 PE=1 SV=1	RU17_YEAST	34 kDa		9	2	4.57477	2	1	2.19797	4	3	6	-2.28739	1.81986	-0.233761	FALSE	0.666537	0.321226	0.414261	0.570872	0.492567	FALSE	FALSE	FALSE
79	60S ribosomal protein L23 OS=Saccharomyces cerevisiae GN=RPL23A PE=1 SV=3	RL23_YEAST	14 kDa		23	3	6.86216	8	6	13.1878	6	9	14	1.16581	-2.19797	-0.516076	FALSE	0.0526467	1.82016	0.81852	0.177294	0.497907	FALSE	FALSE	FALSE
27	PAB1-binding protein 1 OS=Saccharomyces cerevisiae GN=PBP1 PE=1 SV=1	PBP1_YEAST	79 kDa		83	8	18.2991	18	11	24.1776	46	19	64	-1.01662	1.90259	0.442985	FALSE	0.00150924	4.20787	0.969011	0.0402368	0.504624	FALSE	FALSE	FALSE
113	U6 snRNA-associated Sm-like protein LSm4 OS=Saccharomyces cerevisiae GN=LSM4 PE=1 SV=1	LSM4_YEAST	21 kDa		14	2	4.57477	3	4	8.79186	5	6	8	-1.52492	-1.75837	-1.64165	FALSE	0.206581	0.686229	0.64946	0.40745	0.528455	FALSE	FALSE	FALSE
124	Phosphoglycerate mutase 1 OS=Saccharomyces cerevisiae GN=GPM1 PE=1 SV=3	PMG1_YEAST	28 kDa		11	2	4.57477	4	3	6.5939	2	5	6	-1.14369	-3.29695	-2.22032	FALSE	0.0236957	1.74724	0.877662	0.186224	0.531943	FALSE	FALSE	FALSE
115	Pyruvate decarboxylase isozyme 1 OS=Saccharomyces cerevisiae GN=PDC1 PE=1 SV=7	PDC1_YEAST	61 kDa		13.2	2	4.57477	11	0.1	0.219797	0.1	2.1	11.1	2.40449	-2.19797	0.103262	FALSE	1.58081	0.0302422	0.208644	0.861942	0.535293	FALSE	FALSE	FALSE
60	60S ribosomal protein L35 OS=Saccharomyces cerevisiae GN=RPL35A PE=1 SV=1	RL35_YEAST	14 kDa		30	5	11.4369	11	2	4.39593	12	7	23	-1.03972	2.7298	0.845038	FALSE	0.00520779	2.17279	0.942471	0.140471	0.541471	FALSE	FALSE	FALSE
154	Mitochondrial homologous recombination protein 1 OS=Saccharomyces cerevisiae GN=MHR1 PE=1 SV=1	MHR1_YEAST	27 kDa		8	3	6.86216	2	1	2.19797	2	4	4	-3.43108	-1.09898	-2.26503	FALSE	1.86335	0.00587967	0.172238	0.938879	0.555559	FALSE	FALSE	FALSE
80	Protein PBP4 OS=Saccharomyces cerevisiae GN=PBP4 PE=1 SV=1	PBP4_YEAST	20 kDa		22	2	4.57477	4	7	15.3858	9	9	13	-1.14369	-1.70953	-1.42661	FALSE	0.0236957	1.09936	0.877662	0.294406	0.586034	FALSE	FALSE	FALSE
33	60S ribosomal protein L32 OS=Saccharomyces cerevisiae GN=RPL32 PE=1 SV=1	RL32_YEAST	15 kDa		61	14	32.0234	22	8	17.5837	17	22	39	-1.45561	-1.03434	-1.24497	FALSE	1.17609	0.00621295	0.278153	0.937174	0.607664	FALSE	FALSE	FALSE
146	60S ribosomal protein L25 OS=Saccharomyces cerevisiae GN=RPL25 PE=1 SV=4	RL25_YEAST	16 kDa		8	1	2.28739	3	2	4.39593	2	3	5	1.31154	-2.19797	-0.443213	FALSE	0.0576492	0.605448	0.810251	0.436507	0.623379	FALSE	FALSE	FALSE
75	60S ribosomal protein L27-A OS=Saccharomyces cerevisiae GN=RPL27A PE=1 SV=1	RL27A_YEAST (+1)	16 kDa		24	5	11.4369	8	3	6.5939	8	8	16	-1.42962	1.21324	-0.108187	FALSE	0.381708	0.0840728	0.536691	0.771852	0.654271	FALSE	FALSE	FALSE
133	5'-3' exoribonuclease 2 OS=Saccharomyces cerevisiae GN=RAT1 PE=1 SV=3	XRN2_YEAST	116 kDa		10	2	4.57477	4	2	4.39593	2	4	6	-1.14369	-2.19797	-1.67083	FALSE	0.0236957	0.605448	0.877662	0.436507	0.657084	FALSE	FALSE	FALSE
134	E3 ubiquitin-protein ligase TOM1 OS=Saccharomyces cerevisiae GN=TOM1 PE=1 SV=1	TOM1_YEAST	374 kDa		10	2	4.57477	4	2	4.39593	2	4	6	-1.14369	-2.19797	-1.67083	FALSE	0.0236957	0.605448	0.877662	0.436507	0.657084	FALSE	FALSE	FALSE
74	Heat shock protein 26 OS=Saccharomyces cerevisiae GN=HSP26 PE=1 SV=3	HSP26_YEAST	24 kDa		24	3	6.86216	7	6	13.1878	8	9	15	1.02009	-1.64847	-0.314194	FALSE	0.000834562	0.831458	0.976953	0.361851	0.669402	FALSE	FALSE	FALSE
26	Replication factor A protein 1 OS=Saccharomyces cerevisiae GN=RFA1 PE=1 SV=1	RFA1_YEAST	70 kDa		84	18	41.173	35	9	19.7817	22	27	57	-1.17637	1.11214	-0.0321155	FALSE	0.311507	0.0737551	0.576757	0.785946	0.681351	FALSE	FALSE	FALSE
140	40S ribosomal protein S31 OS=Saccharomyces cerevisiae GN=UBI3 PE=1 SV=2	RS37_YEAST	9 kDa		9.2	2	4.57477	7	0.1	0.219797	0.1	2.1	7.1	1.53013	-2.19797	-0.333918	FALSE	0.303764	0.0302422	0.581532	0.861942	0.721737	FALSE	FALSE	FALSE
102	Small nuclear ribonucleoprotein Sm D1 OS=Saccharomyces cerevisiae GN=SMD1 PE=1 SV=1	SMD1_YEAST	16 kDa		17	2	4.57477	5	4	8.79186	6	6	11	1.09295	-1.46531	-0.18618	FALSE	0.0114436	0.340541	0.914809	0.559517	0.737163	FALSE	FALSE	FALSE
49.2	60S ribosomal protein L33-B OS=Saccharomyces cerevisiae GN=RPL33B PE=1 SV=2	RL33B_YEAST	12 kDa	TRUE	32	8	18.2991	14	3	6.5939	7	11	21	-1.30708	1.06159	-0.122745	FALSE	0.357122	0.00757845	0.550109	0.930628	0.740369	FALSE	FALSE	FALSE
136	60S ribosomal protein L31-A OS=Saccharomyces cerevisiae GN=RPL31A PE=1 SV=1	RL31A_YEAST	13 kDa		9	1	2.28739	3	2	4.39593	3	3	6	1.31154	-1.46531	-0.0768851	FALSE	0.0576492	0.170054	0.810251	0.680064	0.745157	FALSE	FALSE	FALSE
114	40S ribosomal protein S29-A OS=Saccharomyces cerevisiae GN=RPS29A PE=1 SV=3	RS29A_YEAST	7 kDa	TRUE	17	4	9.14955	8	2	4.39593	3	6	11	-1.14369	-1.46531	-1.3045	FALSE	0.0474526	0.170054	0.827557	0.680064	0.75381	FALSE	FALSE	FALSE
150	40S ribosomal protein S0-A OS=Saccharomyces cerevisiae (strain RM11-1a) GN=RPS0A PE=3 SV=1	RSSA1_YEAS1 (+5)	28 kDa		8.2	3	6.86216	5	0.1	0.219797	0.1	3.1	5.1	-1.37243	-2.19797	-1.7852	FALSE	0.182695	0.0302422	0.669067	0.861942	0.765504	FALSE	FALSE	FALSE
57	37S ribosomal protein NAM9, mitochondrial OS=Saccharomyces cerevisiae GN=NAM9 PE=1 SV=2	NAM9_YEAST	56 kDa		33	5	11.4369	10	5	10.9898	13	10	23	-1.14369	1.18291	0.0196093	FALSE	0.059354	0.104825	0.80752	0.746115	0.776817	FALSE	FALSE	FALSE
91	Target of rapamycin complex 1 subunit TCO89 OS=Saccharomyces cerevisiae GN=TCO89 PE=1 SV=1	TCO89_YEAST	89 kDa		20	2	4.57477	6	4	8.79186	8	6	14	1.31154	-1.09898	0.106279	FALSE	0.115392	0.0235708	0.734087	0.877982	0.806034	FALSE	FALSE	FALSE
2	60S ribosomal protein L10 OS=Saccharomyces cerevisiae GN=RPL10 PE=1 SV=1	RL10_YEAST	25 kDa		407	51	116.657	112	78	171.441	166	129	278	-1.04158	-1.03278	-1.03718	FALSE	0.0599242	0.0584647	0.806616	0.808939	0.807778	FALSE	FALSE	FALSE
123	Isocitrate dehydrogenase [NADP] cytoplasmic OS=Saccharomyces cerevisiae GN=IDP2 PE=1 SV=2	IDHC_YEAST	47 kDa		11	2	4.57477	6	1	2.19797	2	3	8	1.31154	-1.09898	0.106279	FALSE	0.115392	0.00587967	0.734087	0.938879	0.836483	FALSE	FALSE	FALSE
84	40S ribosomal protein S24 OS=Saccharomyces cerevisiae GN=RPS24A PE=1 SV=3	RS24_YEAST	15 kDa		22	4	9.14955	9	3	6.5939	6	7	15	-1.01662	-1.09898	-1.0578	FALSE	0.000752543	0.0176651	0.978115	0.894265	0.93619	FALSE	FALSE	FALSE
41.1	60S ribosomal protein L8-A OS=Saccharomyces cerevisiae GN=RPL8A PE=1 SV=4	RL8A_YEAST	28 kDa	TRUE	45	11	25.1613	25	3	6.5939	6	14	31	-1.00645	-1.09898	-1.05272	FALSE	0.000317918	0.0176651	0.985774	0.894265	0.940019	FALSE	FALSE	FALSE

## Sheet: ALL_DATA
#	Identified Proteins (262)	Accession Number	Molecular Weight	Protein Grouping Ambiguity	TOTAL SPECTRA	Cntrl.S	/Cntrl.S/	S	Cntrl_no.S	/Cntrl_no.S/	no.S	Fold.Sonication	Fold.No.Sonication	G-stat.S	G-stat.no.S	p-val.S	p-val.no.S	test.S	test.no.S	all.test
10	ATP-dependent RNA helicase DBP2 OS=Saccharomyces cerevisiae (strain YJM789) GN=DBP2 PE=3 SV=1	DBP2	61 kDa	TRUE	184	1	2.33616	73	5	11.0947	105	31.2478	9.464	44.2736	50.0832	2.8554e-11	1.47361e-12	TRUE	TRUE	TRUE		DBP2	YEAS7 (+1)
9	60S ribosomal protein L2 OS=Saccharomyces cerevisiae GN=RPL2A PE=1 SV=3	RPL2A	27 kDa		192	8	18.6893	102	7	15.5325	75	5.45767	4.82857	35.2362	24.7122	2.92042e-09	6.65617e-07	TRUE	TRUE	TRUE		RL2	YEAST
24	60S ribosomal protein L13-B OS=Saccharomyces cerevisiae GN=RPL13B PE=1 SV=1	RL13B	23 kDa		88	4	9.34465	64	3	6.65681	17	6.84884	2.55378	25.0821	2.76602	5.49411e-07	0.0962852	TRUE	FALSE	TRUE		RL13B	YEAST
21	Serine/threonine-protein kinase KSP1 OS=Saccharomyces cerevisiae GN=KSP1 PE=1 SV=1	KSP1	117 kDa		101.1	3	7.00849	58	0.1	0.221894	40	8.27568	180.267	24.8647	28.7647	6.14997e-07	8.1726e-08	TRUE	TRUE	TRUE		KSP1	YEAST
23	ATP-dependent RNA helicase DED1 OS=Saccharomyces cerevisiae (strain YJM789) GN=DED1 PE=3 SV=1	DED1	66 kDa	TRUE	142	5	11.6808	61	9	19.9704	67	5.22224	3.35496	20.3175	15.8376	6.55978e-06	6.90169e-05	TRUE	TRUE	TRUE		DED1	YEAS7 (+1)
39	Meiotic sister-chromatid recombination protein 3 OS=Saccharomyces cerevisiae GN=MSC3 PE=1 SV=1	MSC3	81 kDa		53.2	0.1	0.233616	24	0.1	0.221894	29	102.733	130.693	16.0964	20.5644	6.01984e-05	5.76592e-06	TRUE	TRUE	TRUE		MSC3	YEAST
12	40S ribosomal protein S6 OS=Saccharomyces cerevisiae GN=RPS6A PE=1 SV=1	RPS6A	27 kDa		161	8	18.6893	66	10	22.1894	77	3.53143	3.47013	15.8102	18.9239	7.0024e-05	1.3604e-05	TRUE	TRUE	TRUE		RS6	YEAST
37.1	40S ribosomal protein S1-B OS=Saccharomyces cerevisiae (strain RM11-1a) GN=RPS1B PE=3 SV=1	RS3A2	29 kDa	TRUE	44.1	0.1	0.233616	23	5	11.0947	16	98.452	1.44213	15.3882	0.545065	8.75322e-05	0.460341	TRUE	FALSE	TRUE		RS3A2	YEAS1 (+3)
40	40S ribosomal protein S9-B OS=Saccharomyces cerevisiae GN=RPS9B PE=1 SV=4	RS9B	22 kDa		51	2	4.67233	35	2	4.43787	12	7.49091	2.704	14.2801	2.12753	0.000157518	0.144674	TRUE	FALSE	TRUE		RS9B	YEAST
29	40S ribosomal protein S8 OS=Saccharomyces cerevisiae GN=RPS8A PE=1 SV=3	RPS8A	22 kDa		70	5	11.6808	47	1	2.21894	17	4.02369	7.66133	12.7292	7.28581	0.000359983	0.00695015	TRUE	FALSE	TRUE		RS8	YEAST
36	RNA polymerase II transcriptional coactivator SUB1 OS=Saccharomyces cerevisiae GN=SUB1 PE=1 SV=1	SUB1	33 kDa		52.1	1	2.33616	25	0.1	0.221894	26	10.7013	117.173	11.7926	18.3367	0.00059467	1.85107e-05	TRUE	TRUE	TRUE		SUB1	YEAST
58	Single-stranded nucleic acid-binding protein OS=Saccharomyces cerevisiae GN=SBP1 PE=1 SV=2	SBP1	33 kDa		35.2	0.1	0.233616	17	0.1	0.221894	18	72.7689	81.12	11.1522	12.4208	0.00083933	0.00042457	TRUE	TRUE	TRUE		SSBP1	YEAST
95	Histone-lysine N-methyltransferase, H3 lysine-4 specific OS=Saccharomyces cerevisiae GN=SET1 PE=1 SV=1	SET1	124 kDa		18.2	0.1	0.233616	17	0.1	0.221894	1	72.7689	4.50667	11.1522	0.307721	0.00083933	0.579082	TRUE	FALSE	TRUE		SET1	YEAST
45	Glutamyl-tRNA synthetase, cytoplasmic OS=Saccharomyces cerevisiae GN=GUS1 PE=1 SV=3	SYEC	81 kDa		47.1	0.1	0.233616	13	1	2.21894	33	55.6468	14.872	8.34491	17.9689	0.0038677	2.24547e-05	FALSE	TRUE	TRUE		RL5	YEAST
63.1	Cyclin (Bur2p)-dependent protein kinase OS=Saccharomyces cerevisiae GN=SGV1 PE=1 SV=1	SGV1	74 kDa	TRUE	27.2	0.1	0.233616	11	0.1	0.221894	16	47.0857	72.1067	6.94885	10.9491	0.0083873	0.00093647	FALSE	TRUE	TRUE		BRE1	YEAST
14.1	60S ribosomal protein L4-A OS=Saccharomyces cerevisiae GN=RPL4A PE=1 SV=4	RL4A	39 kDa	TRUE	140	17	39.7148	73	4	8.87574	46	1.83811	5.18267	5.85342	15.8479	0.0155468	6.8641e-05	FALSE	TRUE	TRUE		EF2	YEAST
64	Aminoacyl-tRNA synthetase Cofactor OS=Saccharomyces cerevisiae GN=ARC1 PE=1 SV=2	ARC1	42 kDa		28.2	0.1	0.233616	6	0.1	0.221894	22	25.6831	99.1466	3.49905	15.3737	0.0614039	8.82067e-05	FALSE	TRUE	TRUE		SYEC	YEAST
55	Transcriptional regulatory protein LGE1 OS=Saccharomyces cerevisiae GN=LGE1 PE=1 SV=1	LGE1	37 kDa		35.1	3	7.00849	15	0.1	0.221894	17	2.14026	76.6133	1.70361	11.6845	0.191817	0.000630216	FALSE	TRUE	TRUE		YIF5	YEAST
88	60S ribosomal protein L5 OS=Saccharomyces cerevisiae GN=RPL5 PE=1 SV=3	RL5	34 kDa		21.2	0.1	0.233616	16	0.1	0.221894	5	68.4884	22.5333	10.4488	2.97205	0.00122728	0.0847143	FALSE	FALSE	FALSE		RL17A	YEAST
86	E3 ubiquitin-protein ligase BRE1 OS=Saccharomyces cerevisiae GN=BRE1 PE=1 SV=1	BRE1	81 kDa		21.2	0.1	0.233616	15	0.1	0.221894	6	64.2078	27.04	9.74641	3.68108	0.00179673	0.0550333	FALSE	FALSE	FALSE		ACS1	YEAST
108	Elongation factor 2 OS=Saccharomyces cerevisiae GN=EFT1 PE=1 SV=1	EF2	93 kDa		15.2	0.1	0.233616	14	1	2.21894	0.1	59.9273	-22.1894	9.04507	1.74278	0.00263405	0.186787	FALSE	FALSE	FALSE		PRP42	YEAST
71	Uncharacterized protein YIL055C OS=Saccharomyces cerevisiae GN=YIL055C PE=1 SV=1	YIF5	71 kDa		26.2	0.1	0.233616	13	0.1	0.221894	13	55.6468	58.5867	8.34491	8.74934	0.0038677	0.00309713	FALSE	FALSE	FALSE		BUR1	YEAST
3.1	60S ribosomal protein L17-A OS=Saccharomyces cerevisiae GN=RPL17A PE=1 SV=4	RL17A	21 kDa	TRUE	334	23	53.7318	99	62	137.574	150	1.84249	1.09032	8.0381	0.348968	0.00458035	0.554698	FALSE	FALSE	FALSE		RL21A	YEAST
54	Acetyl-coenzyme A synthetase 1 OS=Saccharomyces cerevisiae GN=ACS1 PE=1 SV=2	ACS1	79 kDa	TRUE	38.1	4	9.34465	32	2	4.43787	0.1	3.42442	-44.3787	7.37125	3.94852	0.00662747	0.0469126	FALSE	FALSE	FALSE		RL4A	YEAST
69	U1 small nuclear ribonucleoprotein component PRP42 OS=Saccharomyces cerevisiae GN=PRP42 PE=1 SV=1	PRP42	65 kDa		27.1	9	21.0255	5	0.1	0.221894	13	-4.20509	58.5867	7.023	8.74934	0.00804695	0.00309713	FALSE	FALSE	FALSE		HSP76	YEAST
15.1	60S ribosomal protein L21-A OS=Saccharomyces cerevisiae GN=RPL21A PE=1 SV=1	RL21A	18 kDa	TRUE	147	14	32.7063	65	11	24.4083	57	1.98739	2.33527	6.33819	8.05154	0.0118166	0.00454649	FALSE	FALSE	FALSE		YG5B	YEAST
100	Heat shock protein SSB2 OS=Saccharomyces cerevisiae GN=SSB2 PE=1 SV=2	SSB2	67 kDa		17.2	0.1	0.233616	9	0.1	0.221894	8	38.5247	36.0533	5.56016	5.1149	0.0183738	0.0237212	FALSE	FALSE	FALSE		KPYK1	YEAST
5	Putative RNA-binding protein YGR250C OS=Saccharomyces cerevisiae GN=YGR250C PE=1 SV=1	RIE1	90 kDa		305	51	119.144	170	16	35.503	68	1.42684	1.91533	5.50102	6.3165	0.0190054	0.0119619	FALSE	FALSE	FALSE		RL34A	YEAST (+1)
48.1	Pyruvate kinase 1 OS=Saccharomyces cerevisiae GN=PYK1 PE=1 SV=2	KPYK1	55 kDa	TRUE	37	2	4.67233	19	10	22.1894	6	4.0665	-3.69823	5.16826	6.70294	0.0230032	0.0096254	FALSE	FALSE	FALSE		PAT1	YEAST
82	60S ribosomal protein L34-A OS=Saccharomyces cerevisiae GN=RPL34A PE=1 SV=1	RL34A	14 kDa		22.1	1	2.33616	14	0.1	0.221894	7	5.99273	31.5467	5.05026	4.39585	0.0246223	0.0360265	FALSE	FALSE	FALSE		RL43	YEAST
118	DNA topoisomerase 2-associated protein PAT1 OS=Saccharomyces cerevisiae GN=PAT1 PE=1 SV=3	PAT1	88 kDa		13.2	0.1	0.233616	8	0.1	0.221894	5	34.2442	22.5333	4.86952	2.97205	0.0273351	0.0847143	FALSE	FALSE	FALSE		HSP77	YEAST
116	60S ribosomal protein L43 OS=Saccharomyces cerevisiae GN=RPL43A PE=1 SV=2	RL43	10 kDa		13.1	0.1	0.233616	8	1	2.21894	4	34.2442	1.80267	4.86952	0.310596	0.0273351	0.577315	FALSE	FALSE	FALSE		ADR1	YEAST
135	Heat shock protein SSC1, mitochondrial OS=Saccharomyces cerevisiae GN=SSC1 PE=1 SV=1	HSP77	71 kDa		8.3	0.1	0.233616	8	0.1	0.221894	0.1	34.2442	-2.21894	4.86952	0.0309575	0.0273351	0.860335	FALSE	FALSE	FALSE		NOP3	YEAST
144	Regulatory protein ADR1 OS=Saccharomyces cerevisiae GN=ADR1 PE=1 SV=2	ADR1	151 kDa		8.3	0.1	0.233616	8	0.1	0.221894	0.1	34.2442	-2.21894	4.86952	0.0309575	0.0273351	0.860335	FALSE	FALSE	FALSE		DBP1	YEAST
18	Nucleolar protein 3 OS=Saccharomyces cerevisiae GN=NPL3 PE=1 SV=1	NPL3	45 kDa		109	9	21.0255	43	8	17.7515	49	2.04514	2.76033	4.45563	9.02858	0.0347864	0.00265791	FALSE	FALSE	FALSE		FBRL	YEAST
98	ATP-dependent RNA helicase DBP1 OS=Saccharomyces cerevisiae GN=DBP1 PE=1 SV=2	DBP1	68 kDa	TRUE	65	4	9.34465	25	4	8.87574	32	2.67533	3.60533	4.20643	8.10261	0.0402709	0.00442017	FALSE	FALSE	FALSE		RS11	YEAST
111	rRNA 2'-O-methyltransferase fibrillarin OS=Saccharomyces cerevisiae GN=NOP1 PE=1 SV=1	NOP1	34 kDa		14.2	0.1	0.233616	7	0.1	0.221894	7	29.9637	31.5467	4.18217	4.39585	0.0408514	0.0360265	FALSE	FALSE	FALSE		G4P1	YEAST
11	40S ribosomal protein S11 OS=Saccharomyces cerevisiae GN=RPS11A PE=1 SV=3	RS11	18 kDa		158	17	39.7148	66	17	37.7219	58	1.66185	1.53757	3.89387	2.66379	0.0484627	0.102656	FALSE	FALSE	FALSE		AIR2	YEAST
92	Protein AIR2 OS=Saccharomyces cerevisiae GN=AIR2 PE=1 SV=1	AIR2	39 kDa		19.2	0.1	0.233616	6	0.1	0.221894	13	25.6831	58.5867	3.49905	8.74934	0.0614039	0.00309713	FALSE	FALSE	FALSE		MS116	YEAST
104	ATP-dependent RNA helicase MSS116, mitochondrial OS=Saccharomyces cerevisiae GN=MSS116 PE=1 SV=1	MS116	76 kDa		16.2	0.1	0.233616	6	0.1	0.221894	10	25.6831	45.0667	3.49905	6.56231	0.0614039	0.0104161	FALSE	FALSE	FALSE		YRA1	YEAST
112	RNA annealing protein YRA1 OS=Saccharomyces cerevisiae GN=YRA1 PE=1 SV=2	YRA1	25 kDa		14.2	0.1	0.233616	6	0.1	0.221894	8	25.6831	36.0533	3.49905	5.1149	0.0614039	0.0237212	FALSE	FALSE	FALSE		RL3	YEAST
25	60S ribosomal protein L3 OS=Saccharomyces cerevisiae GN=RPL3 PE=1 SV=4	RPL3	44 kDa		84	11	25.6978	46	3	6.65681	24	1.79004	3.60533	3.40361	6.06628	0.065054	0.0137787	FALSE	FALSE	FALSE		FUN19	YEAST
103	SWIRM domain-containing protein FUN19 OS=Saccharomyces cerevisiae GN=FUN19 PE=1 SV=3	FUN19	47 kDa		15.2	0.1	0.233616	4	0.1	0.221894	11	17.1221	49.5733	2.15243	7.28955	0.142345	0.00693567	FALSE	FALSE	FALSE		LGE1	YEAST
72	54S ribosomal protein L20, mitochondrial OS=Saccharomyces cerevisiae GN=MRPL20 PE=1 SV=2	RM20	22 kDa		24.1	2	4.67233	11	0.1	0.221894	11	2.35429	49.5733	1.49921	7.28955	0.220793	0.00693567	FALSE	FALSE	FALSE		RM20	YEAST
106	U1 small nuclear ribonucleoprotein component SNU71 OS=Saccharomyces cerevisiae (strain YJM789) GN=SNU71 PE=3 SV=1	SNU71	71 kDa		16.2	0.1	0.233616	2	0.1	0.221894	14	8.56105	63.0933	0.862415	9.48143	0.353064	0.00207563	FALSE	FALSE	FALSE		SNU71	YEAS7 (+1)
138	Lipase 4 OS=Saccharomyces cerevisiae GN=TGL4 PE=1 SV=1	TGL4	103 kDa		9.2	0.1	0.233616	1	0.1	0.221894	8	4.28052	36.0533	0.283439	5.1149	0.594456	0.0237212	FALSE	FALSE	FALSE		TGL4	YEAST
127	Lipase 3 OS=Saccharomyces cerevisiae GN=TGL3 PE=1 SV=2	TGL3	74 kDa		12.3	0.1	0.233616	0.1	0.1	0.221894	12	-2.33616	54.08	0.0349693	8.01865	0.85166	0.0046298	FALSE	FALSE	FALSE		TGL3	YEAST
125	Pre-mRNA-processing protein PRP40 OS=Saccharomyces cerevisiae GN=PRP40 PE=1 SV=1	PRP40	69 kDa		11.3	0.1	0.233616	0.1	0.1	0.221894	11	-2.33616	49.5733	0.0349693	7.28955	0.85166	0.00693567	FALSE	FALSE	FALSE		PRP40	YEAST
158	Protein LUC7 OS=Saccharomyces cerevisiae GN=LUC7 PE=1 SV=1	LUC7	30 kDa		7.3	0.1	0.233616	0.1	0.1	0.221894	7	-2.33616	31.5467	0.0349693	4.39585	0.85166	0.0360265	FALSE	FALSE	FALSE		LUC7	YEAST
27	PAB1-binding protein 1 OS=Saccharomyces cerevisiae GN=PBP1 PE=1 SV=1	PBP1	79 kDa		83	8	18.6893	18	11	24.4083	46	-1.03829	1.88461	0.00782499	4.07572	0.929512	0.0435036	FALSE	FALSE	FALSE		PBP1	YEAST
7	Uncharacterized RNA-binding protein YPL184C OS=Saccharomyces cerevisiae GN=YPL184C PE=1 SV=1	YP184	69 kDa		260	102	238.289	67	56	124.26	35	-3.55655	-3.5503	69.1914	36.5717	8.93584e-17	1.47155e-09	FALSE	FALSE	FALSE
6	Nuclear polyadenylated RNA-binding protein 4 OS=Saccharomyces cerevisiae GN=HRP1 PE=1 SV=1	HRP1	60 kDa		257	88	205.582	55	61	135.355	53	-3.73786	-2.55387	62.7182	25.318	2.38506e-15	4.86141e-07	FALSE	FALSE	FALSE
4	Nuclear and cytoplasmic polyadenylated RNA-binding protein PUB1 OS=Saccharomyces cerevisiae GN=PUB1 PE=1 SV=3	PUB1	51 kDa		331	102	238.289	74	81	179.734	74	-3.22012	-2.42883	61.4391	31.1113	4.56651e-15	2.43648e-08	FALSE	FALSE	FALSE
1	Single-stranded DNA-binding protein RIM1, mitochondrial OS=Saccharomyces cerevisiae GN=RIM1 PE=1 SV=1	RIM1	15 kDa		1079	213	497.603	255	285	632.397	326	-1.95138	-1.93987	55.641	76.3399	8.69917e-14	2.38813e-18	FALSE	FALSE	FALSE
13	Ribonuclease H OS=Saccharomyces cerevisiae GN=RNH1 PE=1 SV=2	RNH1	39 kDa		159	53	123.817	40	30	66.5681	36	-3.09542	-1.84911	29.7348	6.07938	4.95367e-08	0.0136769	FALSE	FALSE	FALSE
16	Protein NAM8 OS=Saccharomyces cerevisiae GN=NAM8 PE=1 SV=2	NAM8	57 kDa		131	42	98.1189	29	31	68.787	29	-3.38341	-2.37197	26.2581	11.1166	2.98698e-07	0.000855605	FALSE	FALSE	FALSE
44	Negative growth regulatory protein NGR1 OS=Saccharomyces cerevisiae GN=NGR1 PE=1 SV=2	NGR1	75 kDa		47	18	42.0509	7	13	28.8462	9	-6.00728	-3.20513	18.8212	7.36624	1.43565e-05	0.00664596	FALSE	FALSE	FALSE
162.1	60S ribosomal protein L6-A OS=Saccharomyces cerevisiae GN=RPL6A PE=1 SV=2	RL6A	20 kDa	TRUE	6.2	5	11.6808	0.1	0.1	0.221894	1	-116.808	4.50667	11.1467	0.307721	0.000841814	0.579082	FALSE	FALSE	FALSE
87	RNA-binding protein NAB6 OS=Saccharomyces cerevisiae GN=NAB6 PE=1 SV=1	NAB6	126 kDa		33.1	15	35.0424	13	5	11.0947	0.1	-2.69557	-110.947	6.77776	10.7932	0.00923007	0.00101871	FALSE	FALSE	FALSE
195	Sphingolipid long chain base-responsive protein LSP1 OS=Saccharomyces cerevisiae GN=LSP1 PE=1 SV=1	LSP1	38 kDa		4.2	3	7.00849	0.1	0.1	0.221894	1	-70.0849	4.50667	6.42078	0.307721	0.0112792	0.579082	FALSE	FALSE	FALSE
42	DNA mismatch repair protein MSH3 OS=Saccharomyces cerevisiae (strain YJM789) GN=MSH3 PE=3 SV=2	MSH3	117 kDa		48	13	30.3701	11	14	31.0651	10	-2.76092	-3.10651	6.09263	7.61955	0.0135747	0.00577387	FALSE	FALSE	FALSE
8	RNA-binding suppressor of PAS kinase protein 1 OS=Saccharomyces cerevisiae GN=RBS1 PE=1 SV=1	RBS1	52 kDa		226	44	102.791	65	27	59.9113	90	-1.5814	1.50222	5.43641	3.78284	0.0197211	0.0517806	FALSE	FALSE	FALSE
47	Polyadenylate-binding protein, cytoplasmic and nuclear OS=Saccharomyces cerevisiae GN=PAB1 PE=1 SV=4	PABP	64 kDa		42	13	30.3701	12	7	15.5325	10	-2.53084	-1.55325	5.28883	0.775594	0.0214627	0.378492	FALSE	FALSE	FALSE
94	ADP,ATP carrier protein 2 OS=Saccharomyces cerevisiae GN=AAC2 PE=1 SV=2	ADT2	34 kDa		20	6	14.017	3	7	15.5325	4	-4.67233	-3.88314	5.14899	4.93632	0.0232599	0.026298	FALSE	FALSE	FALSE
67	ATP synthase subunit beta, mitochondrial OS=Saccharomyces cerevisiae GN=ATP2 PE=1 SV=2	ATPB	55 kDa		27	7	16.3531	5	12	26.6272	3	-3.27063	-8.87574	4.14115	15.3362	0.0418527	8.99744e-05	FALSE	FALSE	FALSE
171	Histone H2A.1 OS=Saccharomyces cerevisiae GN=HTA1 PE=1 SV=2	H2A1	14 kDa	TRUE	13.1	2	4.67233	0.1	6	13.3136	5	-46.7233	-2.66272	4.08829	2.59792	0.0431813	0.107004	FALSE	FALSE	FALSE
167	Sphingolipid long chain base-responsive protein PIL1 OS=Saccharomyces cerevisiae GN=PIL1 PE=1 SV=1	PIL1	38 kDa		6.1	2	4.67233	0.1	2	4.43787	2	-46.7233	-2.21894	4.08829	0.619743	0.0431813	0.431143	FALSE	FALSE	FALSE
234	Endopolyphosphatase OS=Saccharomyces cerevisiae GN=PPN1 PE=1 SV=1	PPN1	78 kDa		2.3	2	4.67233	0.1	0.1	0.221894	0.1	-46.7233	-2.21894	4.08829	0.0309575	0.0431813	0.860335	FALSE	FALSE	FALSE
46.1	Heat shock protein SSA1 OS=Saccharomyces cerevisiae GN=SSA1 PE=1 SV=4	HSP71	70 kDa	TRUE	37	4	9.34465	24	1	2.21894	8	2.56831	3.60533	3.79367	2.01501	0.0514467	0.15575	FALSE	FALSE	FALSE
17	60S ribosomal protein L20 OS=Saccharomyces cerevisiae GN=RPL20A PE=1 SV=2	RL20	20 kDa	TRUE	127	38	88.7742	60	7	15.5325	22	-1.47957	1.41638	3.52118	0.685606	0.0605892	0.407663	FALSE	FALSE	FALSE
99	Histone H4 OS=Saccharomyces cerevisiae GN=HHF1 PE=1 SV=2	H4	11 kDa		17.1	0.1	0.233616	6	4	8.87574	7	25.6831	-1.26796	3.49905	0.140501	0.0614039	0.707783	FALSE	FALSE	FALSE
110	60S ribosomal protein L42 OS=Saccharomyces cerevisiae GN=RPL42A PE=1 SV=3	RL44	12 kDa		15.1	0.1	0.233616	6	2	4.43787	7	25.6831	1.57733	3.49905	0.350507	0.0614039	0.553826	FALSE	FALSE	FALSE
120	Ribosome biogenesis protein NSA2 OS=Saccharomyces cerevisiae (strain YJM789) GN=NSA2 PE=3 SV=1	NSA2	30 kDa		12.2	0.1	0.233616	6	0.1	0.221894	6	25.6831	27.04	3.49905	3.68108	0.0614039	0.0550333	FALSE	FALSE	FALSE
131	54S ribosomal protein L31, mitochondrial OS=Saccharomyces cerevisiae GN=MRPL31 PE=1 SV=1	RM31	16 kDa		10.1	0.1	0.233616	6	1	2.21894	3	25.6831	1.352	3.49905	0.0716233	0.0614039	0.788988	FALSE	FALSE	FALSE
147	26S proteasome regulatory subunit RPN2 OS=Saccharomyces cerevisiae GN=RPN2 PE=1 SV=4	RPN2	104 kDa		8.2	0.1	0.233616	6	2	4.43787	0.1	25.6831	-44.3787	3.49905	3.94852	0.0614039	0.0469126	FALSE	FALSE	FALSE
163	V-type proton ATPase subunit B OS=Saccharomyces cerevisiae GN=VMA2 PE=1 SV=2	VATB	58 kDa		6.3	0.1	0.233616	6	0.1	0.221894	0.1	25.6831	-2.21894	3.49905	0.0309575	0.0614039	0.860335	FALSE	FALSE	FALSE
93	Protein HRB1 OS=Saccharomyces cerevisiae GN=HRB1 PE=1 SV=2	HRB1	52 kDa		18.1	1	2.33616	11	0.1	0.221894	6	4.70857	27.04	3.37093	3.68108	0.0663561	0.0550333	FALSE	FALSE	FALSE
97.1	60S ribosomal protein L36-B OS=Saccharomyces cerevisiae GN=RPL36B PE=1 SV=3	RL36B	11 kDa	TRUE	17	1	2.33616	11	2	4.43787	3	4.70857	-1.47929	3.37093	0.178443	0.0663561	0.672715	FALSE	FALSE	FALSE
76.1	40S ribosomal protein S26-A OS=Saccharomyces cerevisiae GN=RPS26A PE=1 SV=1	RS26A	14 kDa	TRUE	22	1	2.33616	10	2	4.43787	9	4.28052	2.028	2.83897	0.943748	0.0920034	0.331316	FALSE	FALSE	FALSE
145	COMPASS component BRE2 OS=Saccharomyces cerevisiae GN=BRE2 PE=1 SV=2	BRE2	58 kDa		8.2	0.1	0.233616	5	0.1	0.221894	3	21.4026	13.52	2.82165	1.58322	0.0930006	0.208297	FALSE	FALSE	FALSE
148	40S ribosomal protein S15 OS=Saccharomyces cerevisiae GN=RPS15 PE=1 SV=1	RS15	16 kDa		8.1	0.1	0.233616	5	1	2.21894	2	21.4026	-1.10947	2.82165	0.00711401	0.0930006	0.932782	FALSE	FALSE	FALSE
177	Spermidine synthase OS=Saccharomyces cerevisiae GN=SPE3 PE=1 SV=1	SPEE	33 kDa		5.3	0.1	0.233616	5	0.1	0.221894	0.1	21.4026	-2.21894	2.82165	0.0309575	0.0930006	0.860335	FALSE	FALSE	FALSE
179	Cell division control protein 48 OS=Saccharomyces cerevisiae GN=CDC48 PE=1 SV=3	CDC48	92 kDa		5.3	0.1	0.233616	5	0.1	0.221894	0.1	21.4026	-2.21894	2.82165	0.0309575	0.0930006	0.860335	FALSE	FALSE	FALSE
61	Histone H2B.1 OS=Saccharomyces cerevisiae GN=HTB1 PE=1 SV=2	H2B1	14 kDa		30	8	18.6893	8	6	13.3136	8	-2.33616	-1.6642	2.80733	0.86253	0.0938344	0.353032	FALSE	FALSE	FALSE
65	40S ribosomal protein S2 OS=Saccharomyces cerevisiae GN=RPS2 PE=1 SV=3	RS2	27 kDa		28	2	4.67233	14	2	4.43787	10	2.99637	2.25333	2.74691	1.30646	0.0974429	0.253037	FALSE	FALSE	FALSE
20.1	60S ribosomal protein L24-B OS=Saccharomyces cerevisiae GN=RPL24B PE=1 SV=1	RL24B	18 kDa	TRUE	88	7	16.3531	31	11	24.4083	39	1.89566	1.59782	2.67089	2.06876	0.102199	0.150344	FALSE	FALSE	FALSE
35	60S ribosomal protein L28 OS=Saccharomyces cerevisiae GN=RPL28 PE=1 SV=2	RL28	17 kDa		54	7	16.3531	31	5	11.0947	11	1.89566	-1.00861	2.67089	0.000253151	0.102199	0.987306	FALSE	FALSE	FALSE
122	Morphogenesis-related protein MSB1 OS=Saccharomyces cerevisiae GN=MSB1 PE=1 SV=1	MSB1	130 kDa		12.1	5	11.6808	4	3	6.65681	0.1	-2.9202	-66.5681	2.53851	6.2097	0.1111	0.0127052	FALSE	FALSE	FALSE
126	[PIN+] prion protein RNQ1 OS=Saccharomyces cerevisiae GN=RNQ1 PE=1 SV=2	RNQ1	43 kDa		11	5	11.6808	4	1	2.21894	1	-2.9202	-2.21894	2.53851	0.309715	0.1111	0.577855	FALSE	FALSE	FALSE
59	Actin OS=Saccharomyces cerevisiae GN=ACT1 PE=1 SV=1	ACT	42 kDa		31	3	7.00849	17	10	22.1894	1	2.42563	-22.1894	2.44382	17.4704	0.117989	2.91812e-05	FALSE	FALSE	FALSE
22	RNA-binding protein SGN1 OS=Saccharomyces cerevisiae GN=SGN1 PE=1 SV=1	SGN1	29 kDa		96	18	42.0509	26	15	33.284	37	-1.61734	1.11164	2.38997	0.122788	0.122116	0.72603	FALSE	FALSE	FALSE
155	Histone H2A.Z OS=Saccharomyces cerevisiae GN=HTZ1 PE=1 SV=3	H2AZ	14 kDa	TRUE	15	4	9.34465	3	4	8.87574	4	-3.11488	-2.21894	2.21921	1.24074	0.136303	0.265329	FALSE	FALSE	FALSE
156	Fructose-bisphosphate aldolase OS=Saccharomyces cerevisiae GN=FBA1 PE=1 SV=3	ALF	40 kDa		8.1	0.1	0.233616	4	2	4.43787	2	17.1221	-2.21894	2.15243	0.619743	0.142345	0.431143	FALSE	FALSE	FALSE
175	Acetolactate synthase catalytic subunit, mitochondrial OS=Saccharomyces cerevisiae GN=ILV2 PE=1 SV=1	ILVB	75 kDa		5.2	0.1	0.233616	4	1	2.21894	0.1	17.1221	-22.1894	2.15243	1.74278	0.142345	0.186787	FALSE	FALSE	FALSE
183	54S ribosomal protein L10, mitochondrial OS=Saccharomyces cerevisiae GN=MRPL10 PE=1 SV=2	RM10	36 kDa		5.2	0.1	0.233616	4	0.1	0.221894	1	17.1221	4.50667	2.15243	0.307721	0.142345	0.579082	FALSE	FALSE	FALSE
193	Aromatic amino acid aminotransferase 2 OS=Saccharomyces cerevisiae GN=ARO9 PE=1 SV=2	ARO9	59 kDa		5.2	0.1	0.233616	4	1	2.21894	0.1	17.1221	-22.1894	2.15243	1.74278	0.142345	0.186787	FALSE	FALSE	FALSE
185	Pyruvate dehydrogenase E1 component subunit alpha, mitochondrial OS=Saccharomyces cerevisiae GN=PDA1 PE=1 SV=2	ODPA	46 kDa		4.3	0.1	0.233616	4	0.1	0.221894	0.1	17.1221	-2.21894	2.15243	0.0309575	0.142345	0.860335	FALSE	FALSE	FALSE
194	Cell division control protein 13 OS=Saccharomyces cerevisiae GN=CDC13 PE=1 SV=2	CDC13	105 kDa		4.3	0.1	0.233616	4	0.1	0.221894	0.1	17.1221	-2.21894	2.15243	0.0309575	0.142345	0.860335	FALSE	FALSE	FALSE
196	Tubulin alpha-1 chain OS=Saccharomyces cerevisiae GN=TUB1 PE=1 SV=2	TBA1	50 kDa		4.3	0.1	0.233616	4	0.1	0.221894	0.1	17.1221	-2.21894	2.15243	0.0309575	0.142345	0.860335	FALSE	FALSE	FALSE
197	Tubulin beta chain OS=Saccharomyces cerevisiae GN=TUB2 PE=1 SV=2	TBB	51 kDa		4.3	0.1	0.233616	4	0.1	0.221894	0.1	17.1221	-2.21894	2.15243	0.0309575	0.142345	0.860335	FALSE	FALSE	FALSE
198	Ribosome assembly protein RRB1 OS=Saccharomyces cerevisiae GN=RRB1 PE=1 SV=1	RRB1	57 kDa		4.3	0.1	0.233616	4	0.1	0.221894	0.1	17.1221	-2.21894	2.15243	0.0309575	0.142345	0.860335	FALSE	FALSE	FALSE
199	Glucosamine--fructose-6-phosphate aminotransferase [isomerizing] OS=Saccharomyces cerevisiae GN=GFA1 PE=1 SV=4	GFA1	80 kDa		4.3	0.1	0.233616	4	0.1	0.221894	0.1	17.1221	-2.21894	2.15243	0.0309575	0.142345	0.860335	FALSE	FALSE	FALSE
200	Ribose-phosphate pyrophosphokinase 1 OS=Saccharomyces cerevisiae GN=PRS1 PE=1 SV=1	KPR1	47 kDa		4.3	0.1	0.233616	4	0.1	0.221894	0.1	17.1221	-2.21894	2.15243	0.0309575	0.142345	0.860335	FALSE	FALSE	FALSE
230	Acetyl-coenzyme A synthetase 2 OS=Saccharomyces cerevisiae GN=ACS2 PE=1 SV=1	ACS2	75 kDa	TRUE	4.3	0.1	0.233616	4	0.1	0.221894	0.1	17.1221	-2.21894	2.15243	0.0309575	0.142345	0.860335	FALSE	FALSE	FALSE
154	Mitochondrial homologous recombination protein 1 OS=Saccharomyces cerevisiae GN=MHR1 PE=1 SV=1	MHR1	27 kDa		8	3	7.00849	2	1	2.21894	2	-3.50424	-1.10947	1.92623	0.00711401	0.165172	0.932782	FALSE	FALSE	FALSE
172	TBC domain-containing protein YMR192W OS=Saccharomyces cerevisiae GN=YMR192W PE=1 SV=1	YM52	82 kDa		6.1	3	7.00849	2	1	2.21894	0.1	-3.50424	-22.1894	1.92623	1.74278	0.165172	0.186787	FALSE	FALSE	FALSE
85	Potassium-activated aldehyde dehydrogenase, mitochondrial OS=Saccharomyces cerevisiae GN=ALD4 PE=1 SV=2	ALDH4	57 kDa	TRUE	22	2	4.67233	12	5	11.0947	3	2.56831	-3.69823	1.89216	3.34454	0.168959	0.0674285	FALSE	FALSE	FALSE
202	ATP synthase subunit 4, mitochondrial OS=Saccharomyces cerevisiae GN=ATP4 PE=1 SV=1	ATPF	27 kDa		4.1	1	2.33616	0.1	2	4.43787	1	-23.3616	-4.43787	1.81114	1.60241	0.178372	0.205562	FALSE	FALSE	FALSE
152	Protein SUE1, mitochondrial OS=Saccharomyces cerevisiae GN=SUE1 PE=1 SV=1	SUE1	24 kDa		8	2	4.67233	1	3	6.65681	2	-4.67233	-3.3284	1.71399	1.77456	0.190468	0.182818	FALSE	FALSE	FALSE
189	Mitochondrial phosphate carrier protein OS=Saccharomyces cerevisiae GN=MIR1 PE=1 SV=1	MPCP	33 kDa		5	2	4.67233	1	1	2.21894	1	-4.67233	-2.21894	1.71399	0.309715	0.190468	0.577855	FALSE	FALSE	FALSE
115	Pyruvate decarboxylase isozyme 1 OS=Saccharomyces cerevisiae GN=PDC1 PE=1 SV=7	PDC1	61 kDa		13.2	2	4.67233	11	0.1	0.221894	0.1	2.35429	-2.21894	1.49921	0.0309575	0.220793	0.860335	FALSE	FALSE	FALSE
109	Protein PSP2 OS=Saccharomyces cerevisiae GN=PSP2 PE=1 SV=2	PSP2	66 kDa		15.1	0.1	0.233616	3	2	4.43787	10	12.8416	2.25333	1.49596	1.30646	0.221294	0.253037	FALSE	FALSE	FALSE
160	54S ribosomal protein L16, mitochondrial OS=Saccharomyces cerevisiae GN=MRPL16 PE=1 SV=1	RM16	27 kDa		9.2	0.1	0.233616	3	0.1	0.221894	6	12.8416	27.04	1.49596	3.68108	0.221294	0.0550333	FALSE	FALSE	FALSE
137	COMPASS component SPP1 OS=Saccharomyces cerevisiae GN=SPP1 PE=1 SV=1	SPP1	41 kDa		8.2	0.1	0.233616	3	0.1	0.221894	5	12.8416	22.5333	1.49596	2.97205	0.221294	0.0847143	FALSE	FALSE	FALSE
151	Uncharacterized protein YPL034W OS=Saccharomyces cerevisiae GN=YPL034W PE=2 SV=1	YP034	19 kDa		8.1	0.1	0.233616	3	1	2.21894	4	12.8416	1.80267	1.49596	0.310596	0.221294	0.577315	FALSE	FALSE	FALSE
184	60S ribosomal protein L14-A OS=Saccharomyces cerevisiae GN=RPL14A PE=1 SV=1	RL14A	15 kDa		5.1	0.1	0.233616	3	1	2.21894	1	12.8416	-2.21894	1.49596	0.309715	0.221294	0.577855	FALSE	FALSE	FALSE
226	78 kDa glucose-regulated protein homolog OS=Saccharomyces cerevisiae GN=KAR2 PE=1 SV=1	GRP78	74 kDa	TRUE	4.2	0.1	0.233616	3	0.1	0.221894	1	12.8416	4.50667	1.49596	0.307721	0.221294	0.579082	FALSE	FALSE	FALSE
212	Glycerol kinase OS=Saccharomyces cerevisiae GN=GUT1 PE=1 SV=1	GLPK	80 kDa		4.2	0.1	0.233616	3	1	2.21894	0.1	12.8416	-22.1894	1.49596	1.74278	0.221294	0.186787	FALSE	FALSE	FALSE
215	Guanine nucleotide-binding protein subunit beta-like protein OS=Saccharomyces cerevisiae GN=ASC1 PE=1 SV=4	GBLP	35 kDa		3.3	0.1	0.233616	3	0.1	0.221894	0.1	12.8416	-2.21894	1.49596	0.0309575	0.221294	0.860335	FALSE	FALSE	FALSE
216	Mitogen-activated protein kinase FUS3 OS=Saccharomyces cerevisiae GN=FUS3 PE=1 SV=2	FUS3	41 kDa		3.3	0.1	0.233616	3	0.1	0.221894	0.1	12.8416	-2.21894	1.49596	0.0309575	0.221294	0.860335	FALSE	FALSE	FALSE
217	Bifunctional purine biosynthetic protein ADE5,7 OS=Saccharomyces cerevisiae GN=ADE5,7 PE=1 SV=1	PUR2	86 kDa		3.3	0.1	0.233616	3	0.1	0.221894	0.1	12.8416	-2.21894	1.49596	0.0309575	0.221294	0.860335	FALSE	FALSE	FALSE
218	Pre-mRNA-splicing factor ATP-dependent RNA helicase PRP43 OS=Saccharomyces cerevisiae GN=PRP43 PE=1 SV=1	PRP43	88 kDa		3.3	0.1	0.233616	3	0.1	0.221894	0.1	12.8416	-2.21894	1.49596	0.0309575	0.221294	0.860335	FALSE	FALSE	FALSE
224	Pyruvate carboxylase 2 OS=Saccharomyces cerevisiae GN=PYC2 PE=1 SV=2	PYC2	130 kDa		3.3	0.1	0.233616	3	0.1	0.221894	0.1	12.8416	-2.21894	1.49596	0.0309575	0.221294	0.860335	FALSE	FALSE	FALSE
235	26S protease regulatory subunit 8 homolog OS=Saccharomyces cerevisiae GN=RPT6 PE=1 SV=4	PRS8	45 kDa		3.3	0.1	0.233616	3	0.1	0.221894	0.1	12.8416	-2.21894	1.49596	0.0309575	0.221294	0.860335	FALSE	FALSE	FALSE
141	40S ribosomal protein S29-B OS=Saccharomyces cerevisiae GN=RPS29B PE=1 SV=3	RS29B	7 kDa	TRUE	12	4	9.34465	4	2	4.43787	2	-2.33616	-2.21894	1.40118	0.619743	0.236526	0.431143	FALSE	FALSE	FALSE
90	60S ribosomal protein L15-A OS=Saccharomyces cerevisiae GN=RPL15A PE=1 SV=3	RL15A	24 kDa		20.1	3	7.00849	14	0.1	0.221894	3	1.99758	13.52	1.36591	1.58322	0.242515	0.208297	FALSE	FALSE	FALSE
50.1	Alcohol dehydrogenase 1 OS=Saccharomyces cerevisiae GN=ADH1 PE=1 SV=4	ADH1	37 kDa	TRUE	35	7	16.3531	9	11	24.4083	8	-1.81702	-3.05104	1.35574	5.83601	0.244277	0.0157014	FALSE	FALSE	FALSE
33	60S ribosomal protein L32 OS=Saccharomyces cerevisiae GN=RPL32 PE=1 SV=1	RL32	15 kDa		61	14	32.7063	22	8	17.7515	17	-1.48665	-1.0442	1.3088	0.0101849	0.252612	0.919614	FALSE	FALSE	FALSE
30	Uncharacterized ATP-dependent helicase YHR031C OS=Saccharomyces cerevisiae GN=YHR031C PE=1 SV=1	YHJ1	82 kDa		69	10	23.3616	15	23	51.0355	21	-1.55744	-2.43026	1.14127	8.59123	0.285385	0.00337786	FALSE	FALSE	FALSE
78	Protein LSM12 OS=Saccharomyces cerevisiae GN=LSM12 PE=1 SV=1	LSM12	21 kDa		23	3	7.00849	3	4	8.87574	13	-2.33616	1.46467	1.05042	0.476587	0.30541	0.489972	FALSE	FALSE	FALSE
119	60S ribosomal protein L9-A OS=Saccharomyces cerevisiae GN=RPL9A PE=1 SV=2	RL9A	22 kDa		13	3	7.00849	3	4	8.87574	3	-2.33616	-2.95858	1.05042	2.02747	0.30541	0.154478	FALSE	FALSE	FALSE
161	40S ribosomal protein S5 OS=Saccharomyces cerevisiae GN=RPS5 PE=1 SV=3	RS5	25 kDa		6.2	3	7.00849	3	0.1	0.221894	0.1	-2.33616	-2.21894	1.05042	0.0309575	0.30541	0.860335	FALSE	FALSE	FALSE
159	Nucleolar GTP-binding protein 2 OS=Saccharomyces cerevisiae GN=NOG2 PE=1 SV=1	NOG2	55 kDa		7.2	0.1	0.233616	2	0.1	0.221894	5	8.56105	22.5333	0.862415	2.97205	0.353064	0.0847143	FALSE	FALSE	FALSE
165	GTPase-activating protein SAC7 OS=Saccharomyces cerevisiae GN=SAC7 PE=1 SV=2	SAC7	74 kDa		6.2	0.1	0.233616	2	0.1	0.221894	4	8.56105	18.0267	0.862415	2.27124	0.353064	0.131794	FALSE	FALSE	FALSE
164	U6 snRNA-associated Sm-like protein LSm2 OS=Saccharomyces cerevisiae GN=LSM2 PE=1 SV=1	LSM2	11 kDa		6.1	0.1	0.233616	2	1	2.21894	3	8.56105	1.352	0.862415	0.0716233	0.353064	0.788988	FALSE	FALSE	FALSE
187	37S ribosomal protein S12, mitochondrial OS=Saccharomyces cerevisiae GN=MRPS12 PE=1 SV=1	RT12	17 kDa		5.2	0.1	0.233616	2	0.1	0.221894	3	8.56105	13.52	0.862415	1.58322	0.353064	0.208297	FALSE	FALSE	FALSE
191	Zinc finger protein GIS2 OS=Saccharomyces cerevisiae GN=GIS2 PE=1 SV=1	GIS2	17 kDa		5.2	0.1	0.233616	2	0.1	0.221894	3	8.56105	13.52	0.862415	1.58322	0.353064	0.208297	FALSE	FALSE	FALSE
201	U3 small nucleolar RNA-associated protein 11 OS=Saccharomyces cerevisiae (strain AWRI1631) GN=UTP11 PE=3 SV=1	UTP11	30 kDa		4.2	0.1	0.233616	2	0.1	0.221894	2	8.56105	9.01333	0.862415	0.91817	0.353064	0.337956	FALSE	FALSE	FALSE
203	Peroxisomal acyl-coenzyme A thioester hydrolase 1 OS=Saccharomyces cerevisiae GN=TES1 PE=1 SV=1	PTE1	40 kDa		4.2	0.1	0.233616	2	0.1	0.221894	2	8.56105	9.01333	0.862415	0.91817	0.353064	0.337956	FALSE	FALSE	FALSE
210	COMPASS component SWD1 OS=Saccharomyces cerevisiae GN=SWD1 PE=1 SV=1	SWD1	49 kDa		4.2	0.1	0.233616	2	0.1	0.221894	2	8.56105	9.01333	0.862415	0.91817	0.353064	0.337956	FALSE	FALSE	FALSE
211	COMPASS component SWD2 OS=Saccharomyces cerevisiae GN=SWD2 PE=1 SV=1	SWD2	37 kDa		4.2	0.1	0.233616	2	0.1	0.221894	2	8.56105	9.01333	0.862415	0.91817	0.353064	0.337956	FALSE	FALSE	FALSE
223	WD repeat-containing protein YDL156W OS=Saccharomyces cerevisiae GN=YDL156W PE=1 SV=1	YD156	59 kDa		3.2	0.1	0.233616	2	0.1	0.221894	1	8.56105	4.50667	0.862415	0.307721	0.353064	0.579082	FALSE	FALSE	FALSE
233	Ornithine aminotransferase OS=Saccharomyces cerevisiae GN=CAR2 PE=1 SV=2	OAT	46 kDa		2.3	0.1	0.233616	2	0.1	0.221894	0.1	8.56105	-2.21894	0.862415	0.0309575	0.353064	0.860335	FALSE	FALSE	FALSE
236	GTP-binding nuclear protein GSP1/CNR1 OS=Saccharomyces cerevisiae GN=GSP1 PE=1 SV=1	GSP1	25 kDa		2.3	0.1	0.233616	2	0.1	0.221894	0.1	8.56105	-2.21894	0.862415	0.0309575	0.353064	0.860335	FALSE	FALSE	FALSE
238	26S protease regulatory subunit 7 homolog OS=Saccharomyces cerevisiae GN=RPT1 PE=1 SV=1	PRS7	52 kDa		2.3	0.1	0.233616	2	0.1	0.221894	0.1	8.56105	-2.21894	0.862415	0.0309575	0.353064	0.860335	FALSE	FALSE	FALSE
239	Long-chain-fatty-acid--CoA ligase 4 OS=Saccharomyces cerevisiae GN=FAA4 PE=1 SV=1	LCF4	77 kDa		2.3	0.1	0.233616	2	0.1	0.221894	0.1	8.56105	-2.21894	0.862415	0.0309575	0.353064	0.860335	FALSE	FALSE	FALSE
242	Succinyl-CoA ligase [ADP-forming] subunit beta, mitochondrial OS=Saccharomyces cerevisiae GN=LSC2 PE=1 SV=1	SUCB	47 kDa		2.3	0.1	0.233616	2	0.1	0.221894	0.1	8.56105	-2.21894	0.862415	0.0309575	0.353064	0.860335	FALSE	FALSE	FALSE
244	37S ribosomal protein RSM18, mitochondrial OS=Saccharomyces cerevisiae (strain RM11-1a) GN=RSM18 PE=3 SV=2	RSM18	16 kDa		2.3	0.1	0.233616	2	0.1	0.221894	0.1	8.56105	-2.21894	0.862415	0.0309575	0.353064	0.860335	FALSE	FALSE	FALSE
246	26S proteasome regulatory subunit RPN1 OS=Saccharomyces cerevisiae GN=RPN1 PE=1 SV=3	RPN1	109 kDa		2.3	0.1	0.233616	2	0.1	0.221894	0.1	8.56105	-2.21894	0.862415	0.0309575	0.353064	0.860335	FALSE	FALSE	FALSE
247	Protein SQS1 OS=Saccharomyces cerevisiae (strain YJM789) GN=SQS1 PE=3 SV=1	SQS1	87 kDa		2.3	0.1	0.233616	2	0.1	0.221894	0.1	8.56105	-2.21894	0.862415	0.0309575	0.353064	0.860335	FALSE	FALSE	FALSE
248	Reticulon-like protein 1 OS=Saccharomyces cerevisiae GN=RTN1 PE=1 SV=1	RTN1	33 kDa		2.3	0.1	0.233616	2	0.1	0.221894	0.1	8.56105	-2.21894	0.862415	0.0309575	0.353064	0.860335	FALSE	FALSE	FALSE
249	Transposon TyH3 Gag-Pol polyprotein OS=Saccharomyces cerevisiae GN=TY1B PE=1 SV=2	TY1AB	199 kDa		2.3	0.1	0.233616	2	0.1	0.221894	0.1	8.56105	-2.21894	0.862415	0.0309575	0.353064	0.860335	FALSE	FALSE	FALSE
251	Putative mitochondrial translation system component PET127 OS=Saccharomyces cerevisiae GN=PET127 PE=1 SV=2	PT127	93 kDa		2.3	0.1	0.233616	2	0.1	0.221894	0.1	8.56105	-2.21894	0.862415	0.0309575	0.353064	0.860335	FALSE	FALSE	FALSE
121	Ubiquitin OS=Saccharomyces cerevisiae GN=UBI1 PE=1 SV=1	UBIQ	9 kDa		10.1	4	9.34465	5	1	2.21894	0.1	-1.86893	-22.1894	0.838013	1.74278	0.359966	0.186787	FALSE	FALSE	FALSE
101	Phosphoglycerate kinase OS=Saccharomyces cerevisiae GN=PGK1 PE=1 SV=2	PGK	45 kDa		17	2	4.67233	2	9	19.9704	4	-2.33616	-4.9926	0.699972	7.99772	0.402793	0.00468362	FALSE	FALSE	FALSE
130	Mitochondrial outer membrane protein porin 1 OS=Saccharomyces cerevisiae GN=POR1 PE=1 SV=4	VDAC1	30 kDa		10	2	4.67233	2	5	11.0947	1	-2.33616	-11.0947	0.699972	7.03855	0.402793	0.00797736	FALSE	FALSE	FALSE
128	U1 small nuclear ribonucleoprotein 70 kDa homolog OS=Saccharomyces cerevisiae GN=SNP1 PE=1 SV=1	RU17	34 kDa		9	2	4.67233	2	1	2.21894	4	-2.33616	1.80267	0.699972	0.310596	0.402793	0.577315	FALSE	FALSE	FALSE
142	60S ribosomal protein L38 OS=Saccharomyces cerevisiae GN=RPL38 PE=1 SV=1	RL38	9 kDa		9	2	4.67233	2	3	6.65681	2	-2.33616	-3.3284	0.699972	1.77456	0.402793	0.182818	FALSE	FALSE	FALSE
153	40S ribosomal protein S7-B OS=Saccharomyces cerevisiae GN=RPS7B PE=1 SV=1	RS7B	22 kDa		8	2	4.67233	2	3	6.65681	1	-2.33616	-6.65681	0.699972	3.26304	0.402793	0.0708578	FALSE	FALSE	FALSE
157	Protein BOP3 OS=Saccharomyces cerevisiae GN=BOP3 PE=1 SV=1	BOP3	44 kDa		8	2	4.67233	2	2	4.43787	2	-2.33616	-2.21894	0.699972	0.619743	0.402793	0.431143	FALSE	FALSE	FALSE
169	Replication factor A protein 3 OS=Saccharomyces cerevisiae GN=RFA3 PE=1 SV=1	RFA3	14 kDa		6.1	2	4.67233	2	0.1	0.221894	2	-2.33616	9.01333	0.699972	0.91817	0.402793	0.337956	FALSE	FALSE	FALSE
19	60S ribosomal protein L16-B OS=Saccharomyces cerevisiae GN=RPL16B PE=1 SV=3	RL16B	22 kDa	TRUE	163	43	100.455	86	6	13.3136	28	-1.16808	2.10311	0.698118	3.19679	0.403417	0.0737827	FALSE	FALSE	FALSE
51	P24276-DECOY	P24276-DECOY	?		38	9	21.0255	15	7	15.5325	7	-1.4017	-2.21894	0.624249	2.17459	0.429473	0.140307	FALSE	FALSE	FALSE
143	60S ribosomal protein L39 OS=Saccharomyces cerevisiae GN=RPL39 PE=1 SV=3	RL39	6 kDa		9.1	1	2.33616	5	0.1	0.221894	3	2.14026	13.52	0.566637	1.58322	0.451598	0.208297	FALSE	FALSE	FALSE
149	40S ribosomal protein S20 OS=Saccharomyces cerevisiae GN=RPS20 PE=1 SV=3	RS20	14 kDa		8.1	1	2.33616	5	2	4.43787	0.1	2.14026	-44.3787	0.566637	3.94852	0.451598	0.0469126	FALSE	FALSE	FALSE
56	40S ribosomal protein S17-A OS=Saccharomyces cerevisiae GN=RPS17A PE=1 SV=1	RS17A	16 kDa		33	4	9.34465	14	4	8.87574	11	1.49818	1.23933	0.547749	0.139936	0.459239	0.708345	FALSE	FALSE	FALSE
43	60S ribosomal protein L16-A OS=Saccharomyces cerevisiae GN=RPL16A PE=1 SV=3	RL16A	22 kDa	TRUE	105	22	51.3956	61	3	6.65681	19	1.18687	2.85422	0.495188	3.64176	0.481622	0.0563473	FALSE	FALSE	FALSE
34	Ubiquitin-like-specific protease 1 OS=Saccharomyces cerevisiae GN=ULP1 PE=1 SV=1	ULP1	72 kDa		61	13	30.3701	24	10	22.1894	14	-1.26542	-1.58495	0.459185	1.20348	0.498005	0.272628	FALSE	FALSE	FALSE
107	40S ribosomal protein S25-A OS=Saccharomyces cerevisiae GN=RPS25A PE=1 SV=1	RS25A	12 kDa		16	4	9.34465	6	3	6.65681	3	-1.55744	-2.21894	0.455045	0.930085	0.499949	0.334841	FALSE	FALSE	FALSE
75	60S ribosomal protein L27-A OS=Saccharomyces cerevisiae GN=RPL27A PE=1 SV=1	RL27A	16 kDa		24	5	11.6808	8	3	6.65681	8	-1.4601	1.20178	0.427133	0.0759071	0.513399	0.782923	FALSE	FALSE	FALSE
49.2	60S ribosomal protein L33-B OS=Saccharomyces cerevisiae GN=RPL33B PE=1 SV=2	RL33B	12 kDa	TRUE	32	8	18.6893	14	3	6.65681	7	-1.33495	1.05156	0.414576	0.00535461	0.519656	0.941667	FALSE	FALSE	FALSE
62	40S ribosomal protein S16 OS=Saccharomyces cerevisiae GN=RPS16A PE=1 SV=2	RS16	16 kDa		29	5	11.6808	16	2	4.43787	6	1.36977	1.352	0.399076	0.143375	0.527567	0.704948	FALSE	FALSE	FALSE
26	Replication factor A protein 1 OS=Saccharomyces cerevisiae GN=RFA1 PE=1 SV=1	RFA1	70 kDa		84	18	42.0509	35	9	19.9704	22	-1.20146	1.10163	0.396525	0.0610708	0.528889	0.804811	FALSE	FALSE	FALSE
207	Plasma membrane ATPase 1 OS=Saccharomyces cerevisiae GN=PMA1 PE=1 SV=2	PMA1	100 kDa		4.1	1	2.33616	1	0.1	0.221894	2	-2.33616	9.01333	0.349832	0.91817	0.554209	0.337956	FALSE	FALSE	FALSE
209	Malate dehydrogenase, mitochondrial OS=Saccharomyces cerevisiae GN=MDH1 PE=1 SV=2	MDHM	36 kDa		4.1	1	2.33616	1	2	4.43787	0.1	-2.33616	-44.3787	0.349832	3.94852	0.554209	0.0469126	FALSE	FALSE	FALSE
70	60S ribosomal protein L19 OS=Saccharomyces cerevisiae GN=RPL19A PE=1 SV=5	RL19	22 kDa		26	3	7.00849	10	2	4.43787	11	1.42684	2.47867	0.310626	1.70285	0.577296	0.191915	FALSE	FALSE	FALSE
28	40S ribosomal protein S18 OS=Saccharomyces cerevisiae GN=RPS18A PE=1 SV=4	RS18	17 kDa		77	13	30.3701	36	6	13.3136	22	1.18538	1.65244	0.286207	1.30914	0.592661	0.252551	FALSE	FALSE	FALSE
180	U6 snRNA-associated Sm-like protein LSm6 OS=Saccharomyces cerevisiae (strain YJM789) GN=LSM6 PE=3 SV=1	LSM6	9 kDa		5.2	0.1	0.233616	1	0.1	0.221894	4	4.28052	18.0267	0.283439	2.27124	0.594456	0.131794	FALSE	FALSE	FALSE
188	Glucan 1,3-beta-glucosidase OS=Saccharomyces cerevisiae GN=BGL2 PE=1 SV=1	BGL2	34 kDa		5.1	0.1	0.233616	1	2	4.43787	2	4.28052	-2.21894	0.283439	0.619743	0.594456	0.431143	FALSE	FALSE	FALSE
206	Serine/threonine-protein phosphatase PP-Z2 OS=Saccharomyces cerevisiae GN=PPZ2 PE=1 SV=4	PPZ2	78 kDa		4.2	0.1	0.233616	1	0.1	0.221894	3	4.28052	13.52	0.283439	1.58322	0.594456	0.208297	FALSE	FALSE	FALSE
204	40S ribosomal protein S19-A OS=Saccharomyces cerevisiae GN=RPS19A PE=1 SV=2	RS19A	16 kDa		4.1	0.1	0.233616	1	2	4.43787	1	4.28052	-4.43787	0.283439	1.60241	0.594456	0.205562	FALSE	FALSE	FALSE
219	37S ribosomal protein S35, mitochondrial OS=Saccharomyces cerevisiae GN=MRPS35 PE=1 SV=1	RT35	40 kDa		3.2	0.1	0.233616	1	0.1	0.221894	2	4.28052	9.01333	0.283439	0.91817	0.594456	0.337956	FALSE	FALSE	FALSE
225	Cytochrome b-c1 complex subunit 2, mitochondrial OS=Saccharomyces cerevisiae GN=QCR2 PE=1 SV=1	QCR2	40 kDa		3.2	0.1	0.233616	1	2	4.43787	0.1	4.28052	-44.3787	0.283439	3.94852	0.594456	0.0469126	FALSE	FALSE	FALSE
227	54S ribosomal protein L25, mitochondrial OS=Saccharomyces cerevisiae GN=MRPL25 PE=1 SV=2	RM25	19 kDa		3.2	0.1	0.233616	1	0.1	0.221894	2	4.28052	9.01333	0.283439	0.91817	0.594456	0.337956	FALSE	FALSE	FALSE
140	40S ribosomal protein S31 OS=Saccharomyces cerevisiae GN=UBI3 PE=1 SV=2	RS37	9 kDa		9.2	2	4.67233	7	0.1	0.221894	0.1	1.49818	-2.21894	0.273404	0.0309575	0.601058	0.860335	FALSE	FALSE	FALSE
132	Succinate dehydrogenase [ubiquinone] flavoprotein subunit, mitochondrial OS=Saccharomyces cerevisiae GN=SDH1 PE=1 SV=1	DHSA	70 kDa		10	1	2.33616	4	1	2.21894	4	1.71221	1.80267	0.25635	0.310596	0.612639	0.577315	FALSE	FALSE	FALSE
190	ATP-dependent DNA helicase SRS2 OS=Saccharomyces cerevisiae GN=SRS2 PE=1 SV=2	SRS2	134 kDa		5.2	1	2.33616	4	0.1	0.221894	0.1	1.71221	-2.21894	0.25635	0.0309575	0.612639	0.860335	FALSE	FALSE	FALSE
73	40S ribosomal protein S3 OS=Saccharomyces cerevisiae GN=RPS3 PE=1 SV=5	RS3	27 kDa		25	7	16.3531	13	4	8.87574	1	-1.25793	-8.87574	0.234709	5.09896	0.628054	0.0239402	FALSE	FALSE	FALSE
113	U6 snRNA-associated Sm-like protein LSm4 OS=Saccharomyces cerevisiae GN=LSM4 PE=1 SV=1	LSM4	21 kDa		14	2	4.67233	3	4	8.87574	5	-1.55744	-1.77515	0.22728	0.708911	0.633548	0.399806	FALSE	FALSE	FALSE
166	ATP synthase subunit gamma, mitochondrial OS=Saccharomyces cerevisiae GN=ATP3 PE=1 SV=1	ATPG	34 kDa		6.1	2	4.67233	3	1	2.21894	0.1	-1.55744	-22.1894	0.22728	1.74278	0.633548	0.186787	FALSE	FALSE	FALSE
168	Replication factor A protein 2 OS=Saccharomyces cerevisiae GN=RFA2 PE=1 SV=1	RFA2	30 kDa		6.1	2	4.67233	3	0.1	0.221894	1	-1.55744	4.50667	0.22728	0.307721	0.633548	0.579082	FALSE	FALSE	FALSE
150	40S ribosomal protein S0-A OS=Saccharomyces cerevisiae (strain RM11-1a) GN=RPS0A PE=3 SV=1	RSSA1	28 kDa		8.2	3	7.00849	5	0.1	0.221894	0.1	-1.4017	-2.21894	0.207381	0.0309575	0.648828	0.860335	FALSE	FALSE	FALSE
68	Enolase 1 OS=Saccharomyces cerevisiae GN=ENO1 PE=1 SV=2	ENO1	47 kDa		27	4	9.34465	7	10	22.1894	6	-1.33495	-3.69823	0.206809	6.70294	0.64928	0.0096254	FALSE	FALSE	FALSE
52	40S ribosomal protein S14-A OS=Saccharomyces cerevisiae GN=RPS14A PE=1 SV=5	RS14A	15 kDa		38	4	9.34465	12	11	24.4083	11	1.28416	-2.21894	0.195933	3.42415	0.658023	0.0642491	FALSE	FALSE	FALSE
2	60S ribosomal protein L10 OS=Saccharomyces cerevisiae GN=RPL10 PE=1 SV=1	RL10	25 kDa		407	51	119.144	112	78	173.077	166	-1.06379	-1.04263	0.137515	0.097606	0.710764	0.754722	FALSE	FALSE	FALSE
38	Glyceraldehyde-3-phosphate dehydrogenase 3 OS=Saccharomyces cerevisiae GN=TDH3 PE=1 SV=3	G3P3	36 kDa		53	8	18.6893	16	18	39.9408	11	-1.16808	-3.63099	0.127058	11.863	0.721502	0.0005726	FALSE	FALSE	FALSE
32	Elongation factor 1-alpha OS=Saccharomyces cerevisiae GN=TEF1 PE=1 SV=1	EF1A	50 kDa		61	7	16.3531	19	18	39.9408	17	1.16186	-2.34946	0.118348	6.29872	0.730833	0.0120825	FALSE	FALSE	FALSE
31.1	60S ribosomal protein L37-A OS=Saccharomyces cerevisiae GN=RPL37A PE=1 SV=2	RL37A	10 kDa	TRUE	58	9	21.0255	24	6	13.3136	19	1.14147	1.42711	0.117633	0.61491	0.731616	0.432945	FALSE	FALSE	FALSE
91	Target of rapamycin complex 1 subunit TCO89 OS=Saccharomyces cerevisiae GN=TCO89 PE=1 SV=1	TCO89	89 kDa		20	2	4.67233	6	4	8.87574	8	1.28416	-1.10947	0.0978136	0.0285167	0.754469	0.8659	FALSE	FALSE	FALSE
105	40S ribosomal protein S23 OS=Saccharomyces cerevisiae GN=RPS23A PE=1 SV=1	RS23	16 kDa		16	2	4.67233	6	2	4.43787	6	1.28416	1.352	0.0978136	0.143375	0.754469	0.704948	FALSE	FALSE	FALSE
123	Isocitrate dehydrogenase [NADP] cytoplasmic OS=Saccharomyces cerevisiae GN=IDP2 PE=1 SV=2	IDHC	47 kDa		11	2	4.67233	6	1	2.21894	2	1.28416	-1.10947	0.0978136	0.00711401	0.754469	0.932782	FALSE	FALSE	FALSE
89	56 kDa U1 small nuclear ribonucleoprotein component OS=Saccharomyces cerevisiae GN=SNU56 PE=1 SV=1	SNU56	57 kDa		21.1	4	9.34465	11	0.1	0.221894	6	1.17714	27.04	0.0802062	3.68108	0.777018	0.0550333	FALSE	FALSE	FALSE
57	37S ribosomal protein NAM9, mitochondrial OS=Saccharomyces cerevisiae GN=NAM9 PE=1 SV=2	NAM9	56 kDa		33	5	11.6808	10	5	11.0947	13	-1.16808	1.17173	0.0792636	0.0931711	0.778298	0.760184	FALSE	FALSE	FALSE
114	40S ribosomal protein S29-A OS=Saccharomyces cerevisiae GN=RPS29A PE=1 SV=3	RS29A	7 kDa	TRUE	17	4	9.34465	8	2	4.43787	3	-1.16808	-1.47929	0.0633716	0.178443	0.801244	0.672715	FALSE	FALSE	FALSE
136	60S ribosomal protein L31-A OS=Saccharomyces cerevisiae GN=RPL31A PE=1 SV=1	RL31A	13 kDa		9	1	2.33616	3	2	4.43787	3	1.28416	-1.47929	0.0488686	0.178443	0.825044	0.672715	FALSE	FALSE	FALSE
146	60S ribosomal protein L25 OS=Saccharomyces cerevisiae GN=RPL25 PE=1 SV=4	RL25	16 kDa		8	1	2.33616	3	2	4.43787	2	1.28416	-2.21894	0.0488686	0.619743	0.825044	0.431143	FALSE	FALSE	FALSE
173.1	40S ribosomal protein S10-B OS=Saccharomyces cerevisiae GN=RPS10B PE=1 SV=1	RS10B	13 kDa	TRUE	4.2	1	2.33616	3	0.1	0.221894	0.1	1.28416	-2.21894	0.0488686	0.0309575	0.825044	0.860335	FALSE	FALSE	FALSE
117	60S ribosomal protein L7-A OS=Saccharomyces cerevisiae GN=RPL7A PE=1 SV=3	RL7A	28 kDa		13.1	3	7.00849	6	0.1	0.221894	4	-1.16808	18.0267	0.0474993	2.27124	0.827473	0.131794	FALSE	FALSE	FALSE
79	60S ribosomal protein L23 OS=Saccharomyces cerevisiae GN=RPL23A PE=1 SV=3	RL23	14 kDa		23	3	7.00849	8	6	13.3136	6	1.14147	-2.21894	0.0390396	1.86299	0.84337	0.17228	FALSE	FALSE	FALSE
170	Serine/threonine-protein kinase TOR1 OS=Saccharomyces cerevisiae GN=TOR1 PE=1 SV=3	TOR1	281 kDa		6.3	0.1	0.233616	0.1	0.1	0.221894	6	-2.33616	27.04	0.0349693	3.68108	0.85166	0.0550333	FALSE	FALSE	FALSE
174	CTD kinase subunit alpha OS=Saccharomyces cerevisiae GN=CTK1 PE=1 SV=1	CTK1	61 kDa		5.3	0.1	0.233616	0.1	0.1	0.221894	5	-2.33616	22.5333	0.0349693	2.97205	0.85166	0.0847143	FALSE	FALSE	FALSE
178	Lipase 5 OS=Saccharomyces cerevisiae GN=TGL5 PE=1 SV=1	TGL5	85 kDa		5.3	0.1	0.233616	0.1	0.1	0.221894	5	-2.33616	22.5333	0.0349693	2.97205	0.85166	0.0847143	FALSE	FALSE	FALSE
181	Small nuclear ribonucleoprotein Sm D2 OS=Saccharomyces cerevisiae GN=SMD2 PE=1 SV=2	SMD2	13 kDa		5.3	0.1	0.233616	0.1	0.1	0.221894	5	-2.33616	22.5333	0.0349693	2.97205	0.85166	0.0847143	FALSE	FALSE	FALSE
182	U1 small nuclear ribonucleoprotein A OS=Saccharomyces cerevisiae GN=MUD1 PE=1 SV=1	RU1A	34 kDa		5.3	0.1	0.233616	0.1	0.1	0.221894	5	-2.33616	22.5333	0.0349693	2.97205	0.85166	0.0847143	FALSE	FALSE	FALSE
176	Small nuclear ribonucleoprotein-associated protein B OS=Saccharomyces cerevisiae GN=SMB1 PE=1 SV=1	RSMB	22 kDa		5.2	0.1	0.233616	0.1	1	2.21894	4	-2.33616	1.80267	0.0349693	0.310596	0.85166	0.577315	FALSE	FALSE	FALSE
186	Sm-like protein LSm1 OS=Saccharomyces cerevisiae GN=LSM1 PE=1 SV=1	LSM1	20 kDa		5.2	0.1	0.233616	0.1	1	2.21894	4	-2.33616	1.80267	0.0349693	0.310596	0.85166	0.577315	FALSE	FALSE	FALSE
208	Cytochrome c iso-1 OS=Saccharomyces cerevisiae GN=CYC1 PE=1 SV=2	CYC1	12 kDa		4.3	0.1	0.233616	0.1	4	8.87574	0.1	-2.33616	-88.7574	0.0349693	8.49466	0.85166	0.0035619	FALSE	FALSE	FALSE
214	Uncharacterized protein YMR147W OS=Saccharomyces cerevisiae GN=YMR147W PE=1 SV=1	YM24	26 kDa		3.3	0.1	0.233616	0.1	0.1	0.221894	3	-2.33616	13.52	0.0349693	1.58322	0.85166	0.208297	FALSE	FALSE	FALSE
220	Nucleolar GTP-binding protein 1 OS=Saccharomyces cerevisiae GN=NOG1 PE=1 SV=1	NOG1	74 kDa		3.3	0.1	0.233616	0.1	0.1	0.221894	3	-2.33616	13.52	0.0349693	1.58322	0.85166	0.208297	FALSE	FALSE	FALSE
229	Bypass of stop codon protein 2 OS=Saccharomyces cerevisiae GN=BSC2 PE=1 SV=1	BSC2	27 kDa		3.3	0.1	0.233616	0.1	0.1	0.221894	3	-2.33616	13.52	0.0349693	1.58322	0.85166	0.208297	FALSE	FALSE	FALSE
221	U6 snRNA-associated Sm-like protein LSm7 OS=Saccharomyces cerevisiae GN=LSM7 PE=1 SV=2	LSM7	13 kDa		3.2	0.1	0.233616	0.1	2	4.43787	1	-2.33616	-4.43787	0.0349693	1.60241	0.85166	0.205562	FALSE	FALSE	FALSE
222	60S ribosomal protein L26-A OS=Saccharomyces cerevisiae GN=RPL26A PE=1 SV=3	RL26A	14 kDa		3.2	0.1	0.233616	0.1	2	4.43787	1	-2.33616	-4.43787	0.0349693	1.60241	0.85166	0.205562	FALSE	FALSE	FALSE
228	Triosephosphate isomerase OS=Saccharomyces cerevisiae GN=TPI1 PE=1 SV=2	TPIS	27 kDa		3.2	0.1	0.233616	0.1	2	4.43787	1	-2.33616	-4.43787	0.0349693	1.60241	0.85166	0.205562	FALSE	FALSE	FALSE
232	Protein FMP52, mitochondrial OS=Saccharomyces cerevisiae GN=FMP52 PE=1 SV=1	FMP52	25 kDa		2.3	0.1	0.233616	0.1	2	4.43787	0.1	-2.33616	-44.3787	0.0349693	3.94852	0.85166	0.0469126	FALSE	FALSE	FALSE
245	ATP synthase subunit 5, mitochondrial OS=Saccharomyces cerevisiae GN=ATP5 PE=1 SV=1	ATPO	23 kDa		2.3	0.1	0.233616	0.1	2	4.43787	0.1	-2.33616	-44.3787	0.0349693	3.94852	0.85166	0.0469126	FALSE	FALSE	FALSE
231	Protein AIR1 OS=Saccharomyces cerevisiae GN=AIR1 PE=1 SV=1	AIR1	42 kDa		2.3	0.1	0.233616	0.1	0.1	0.221894	2	-2.33616	9.01333	0.0349693	0.91817	0.85166	0.337956	FALSE	FALSE	FALSE
237	Serine/threonine-protein kinase CBK1 OS=Saccharomyces cerevisiae GN=CBK1 PE=1 SV=1	CBK1	87 kDa		2.3	0.1	0.233616	0.1	0.1	0.221894	2	-2.33616	9.01333	0.0349693	0.91817	0.85166	0.337956	FALSE	FALSE	FALSE
240	Small nuclear ribonucleoprotein F OS=Saccharomyces cerevisiae GN=SMX3 PE=1 SV=1	RUXF	10 kDa		2.3	0.1	0.233616	0.1	0.1	0.221894	2	-2.33616	9.01333	0.0349693	0.91817	0.85166	0.337956	FALSE	FALSE	FALSE
241	Splicing factor MUD2 OS=Saccharomyces cerevisiae GN=MUD2 PE=1 SV=3	MUD2	60 kDa		2.3	0.1	0.233616	0.1	0.1	0.221894	2	-2.33616	9.01333	0.0349693	0.91817	0.85166	0.337956	FALSE	FALSE	FALSE
243	Small nuclear ribonucleoprotein Sm D3 OS=Saccharomyces cerevisiae GN=SMD3 PE=1 SV=1	SMD3	11 kDa		2.3	0.1	0.233616	0.1	0.1	0.221894	2	-2.33616	9.01333	0.0349693	0.91817	0.85166	0.337956	FALSE	FALSE	FALSE
250	Histone H3 OS=Saccharomyces cerevisiae GN=HHT1 PE=1 SV=2	H3	15 kDa		2.3	0.1	0.233616	0.1	0.1	0.221894	2	-2.33616	9.01333	0.0349693	0.91817	0.85166	0.337956	FALSE	FALSE	FALSE
80	Protein PBP4 OS=Saccharomyces cerevisiae GN=PBP4 PE=1 SV=1	PBP4	20 kDa		22	2	4.67233	4	7	15.5325	9	-1.16808	-1.72584	0.0316466	1.13758	0.858806	0.286165	FALSE	FALSE	FALSE
96	26S protease regulatory subunit 4 homolog OS=Saccharomyces cerevisiae GN=RPT2 PE=1 SV=3	PRS4	49 kDa		18	2	4.67233	4	8	17.7515	4	-1.16808	-4.43787	0.0316466	6.4246	0.858806	0.011255	FALSE	FALSE	FALSE
124	Phosphoglycerate mutase 1 OS=Saccharomyces cerevisiae GN=GPM1 PE=1 SV=3	PMG1	28 kDa		11	2	4.67233	4	3	6.65681	2	-1.16808	-3.3284	0.0316466	1.77456	0.858806	0.182818	FALSE	FALSE	FALSE
133	5'-3' exoribonuclease 2 OS=Saccharomyces cerevisiae GN=RAT1 PE=1 SV=3	XRN2	116 kDa		10	2	4.67233	4	2	4.43787	2	-1.16808	-2.21894	0.0316466	0.619743	0.858806	0.431143	FALSE	FALSE	FALSE
134	E3 ubiquitin-protein ligase TOM1 OS=Saccharomyces cerevisiae GN=TOM1 PE=1 SV=1	TOM1	374 kDa		10	2	4.67233	4	2	4.43787	2	-1.16808	-2.21894	0.0316466	0.619743	0.858806	0.431143	FALSE	FALSE	FALSE
192	40S ribosomal protein S27-A OS=Saccharomyces cerevisiae GN=RPS27A PE=1 SV=1	RS27A	9 kDa		5	1	2.33616	2	1	2.21894	1	-1.16808	-2.21894	0.0158135	0.309715	0.899928	0.577855	FALSE	FALSE	FALSE
205	Uncharacterized mitochondrial membrane protein FMP10 OS=Saccharomyces cerevisiae GN=FMP10 PE=1 SV=1	FMP10	28 kDa		4.1	1	2.33616	2	0.1	0.221894	1	-1.16808	4.50667	0.0158135	0.307721	0.899928	0.579082	FALSE	FALSE	FALSE
81	Pre-mRNA-processing factor 39 OS=Saccharomyces cerevisiae GN=PRP39 PE=1 SV=1	PRP39	75 kDa		22	4	9.34465	10	1	2.21894	7	1.07013	3.15467	0.0132895	1.52051	0.908223	0.217542	FALSE	FALSE	FALSE
83	40S ribosomal protein S13 OS=Saccharomyces cerevisiae GN=RPS13 PE=1 SV=3	RS13	17 kDa		22	4	9.34465	10	1	2.21894	7	1.07013	3.15467	0.0132895	1.52051	0.908223	0.217542	FALSE	FALSE	FALSE
60	60S ribosomal protein L35 OS=Saccharomyces cerevisiae GN=RPL35A PE=1 SV=1	RL35	14 kDa		30	5	11.6808	11	2	4.43787	12	-1.06189	2.704	0.0123428	2.12753	0.911538	0.144674	FALSE	FALSE	FALSE
77	ATP synthase subunit alpha, mitochondrial OS=Saccharomyces cerevisiae GN=ATP1 PE=1 SV=3	ATPA	59 kDa		23	5	11.6808	11	5	11.0947	2	-1.06189	-5.54734	0.0123428	4.81154	0.911538	0.0282698	FALSE	FALSE	FALSE
102	Small nuclear ribonucleoprotein Sm D1 OS=Saccharomyces cerevisiae GN=SMD1 PE=1 SV=1	SMD1	16 kDa		17	2	4.67233	5	4	8.87574	6	1.07013	-1.47929	0.00663545	0.357321	0.935078	0.549998	FALSE	FALSE	FALSE
129	U1 small nuclear ribonucleoprotein C homolog OS=Saccharomyces cerevisiae GN=YHC1 PE=1 SV=1	RU1C	27 kDa		10.1	2	4.67233	5	0.1	0.221894	3	1.07013	13.52	0.00663545	1.58322	0.935078	0.208297	FALSE	FALSE	FALSE
139	60S ribosomal protein L18 OS=Saccharomyces cerevisiae GN=RPL18A PE=1 SV=1	RL18	21 kDa		9.1	2	4.67233	5	0.1	0.221894	2	1.07013	9.01333	0.00663545	0.91817	0.935078	0.337956	FALSE	FALSE	FALSE
41.1	60S ribosomal protein L8-A OS=Saccharomyces cerevisiae GN=RPL8A PE=1 SV=4	RL8A	28 kDa	TRUE	45	11	25.6978	25	3	6.65681	6	-1.02791	-1.10947	0.00581093	0.0213723	0.939237	0.883769	FALSE	FALSE	FALSE
84	40S ribosomal protein S24 OS=Saccharomyces cerevisiae GN=RPS24A PE=1 SV=3	RS24	15 kDa		22	4	9.34465	9	3	6.65681	6	-1.03829	-1.10947	0.00390214	0.0213723	0.950191	0.883769	FALSE	FALSE	FALSE
53	40S ribosomal protein S4 OS=Saccharomyces cerevisiae GN=RPS4A PE=1 SV=3	RS4	29 kDa		37	8	18.6893	19	3	6.65681	7	1.01662	1.05156	0.00154215	0.00535461	0.968675	0.941667	FALSE	FALSE	FALSE
66.1	60S ribosomal protein L11-A OS=Saccharomyces cerevisiae GN=RPL11A PE=1 SV=2	RL11A	20 kDa	TRUE	26	3	7.00849	7	3	6.65681	13	-1.00121	1.95289	3.09115e-06	1.24867	0.998597	0.263807	FALSE	FALSE	FALSE
74	Heat shock protein 26 OS=Saccharomyces cerevisiae GN=HSP26 PE=1 SV=3	HSP26	24 kDa		24	3	7.00849	7	6	13.3136	8	-1.00121	-1.6642	3.09115e-06	0.86253	0.998597	0.353032	FALSE	FALSE	FALSE
